# Supplementary material for: Assessment of rockfall hazard on the steep-high slopes: Ermenek (Karaman, Turkey)
Source: Copernicus journal article supplement (doi:10.5194/nhess-2015-337), 2016-01-19
Supplement: Supplementary file [file nhess-2015-337-AC1-supplement.zip]

**Table 5** Results of the coefficient of restitutions obtained from back analysis in the field

| Profile                   | Coefficient of restitutions |                 | Friction angle<br>(°) |
|---------------------------|-----------------------------|-----------------|-----------------------|
|                           | Normal (Rn)                 | Tangential (Rt) |                       |
| <b>1</b>                  | 0,34                        | 0,53            | 24,00                 |
| <b>2</b>                  | 0,29                        | 0,58            | 39,50                 |
| <b>3</b>                  | 0,32                        | 0,69            | 25,21                 |
| <b>4</b>                  | 0,28                        | 0,42            | 11,00                 |
| <b>5</b>                  | 0,32                        | 0,80            | 53,00                 |
| <b>6</b>                  | 0,35                        | 0,82            | 54,00                 |
| <b>7</b>                  | 0,36                        | 0,78            | 16,00                 |
| <b>8</b>                  | 0,34                        | 0,87            | 58,00                 |
| <b>9</b>                  | 0,30                        | 0,35            | 70,00                 |
| <b>10</b>                 | 0,40                        | 0,47            | 63,00                 |
| <b>Maximum</b>            | 0,40                        | 0,87            | 70,00                 |
| <b>Minimum</b>            | 0,28                        | 0,35            | 11,00                 |
| <b>Average</b>            | 0,33                        | 0,63            | 41,47                 |
| <b>Standart Deviation</b> | 0,04                        | 0,19            | 20,97                 |
