# Supplementary material for: Assessment of rockfall hazard on the steep-high slopes: Ermenek (Karaman, Turkey)
Source: Copernicus journal article supplement (doi:10.5194/nhess-2015-337), 2016-01-19
Supplement: Supplementary file [file nhess-2015-337-AC1-supplement.zip]

# Assessment of rockfall hazard on the steep-high slopes:

## Ermenek (Karaman, Turkey)

Hidayet Taga and Kıvanç Zorlu

Mersin University, Department of Geological Engineering, Mersin, Turkey

### Abstract

Ermenek is one of the curious settlement areas because of its topographical features in Karaman (Turkey). The city is located in northern side of the very steep cliffs formed by jointed limestone which are suddenly increased from 1250 m to 1850 m. Moreover, these cliffs having almost 90° slope dip are the main rockfall source areas due to their lithological characteristics, climatic effects and engineering properties of rock units. Up to now, depending on rockfall events, almost 500 residences were damaged severely, and losses of lives were also recorded in Ermenek. The rockfall phenomenon are initiated by discontinuities, lithological changes, weathering and freeze-thaw process in the study area. In this study, extensive fieldwork including determination of location and dimension of hanging, detached and already fallen blocks, a detailed discontinuity survey, description of geological, morphological and topographical characteristics was performed. Besides, rockfall hazard is evaluated by two-dimensional rockfall analyses along 10 profiles. During the rockfall analyses; run out distance, bounce height, kinetic energy and velocity of various size of blocks for each profiles are determined by using RocFall v4.0 software. The results obtained from rockfall analyses were used to map the areas possible rockfall hazard zones and rockfall source areas were interpreted.

According to rockfall analysis, field study and laboratory testing, protective and preventive recommendations can be suggested for the areas under rockfall threat. But, the most widely-known remedial measures in literature such as trenches, retaining walls (barrier), wire meshes, cable/streching nets and rock bolting etc. are not sufficient in the study area, due to topographical, atmospheric and lithological features. For these reasons, firstly total evacuation of the danger zone should be applied and then hanging blocks in the reachable locations can be removed taking safety measures in this area to make it safer for the living people.

**Keywords:** Hazard, Rockfall, Limestone, Zonation map, Ermenek.

## 38 Introduction

39  
40 Rockfall is a fast movement of the blocks which are detached from the bedrock along  
41 discontinuities that slides, rolls or falls along vertically travels down slope by bouncing and  
42 flying along trajectories (Varnes, 1978; Whalley 1984; Dorren 2003). Due to their high speed  
43 and energy, rockfalls can be admissible as a substantially destructive mass movement  
44 resulting in significant damage and loss of live. This movement is mainly controlled by the  
45 geological conditions of the rock units, climatic influences and the weathering processes.  
46 Besides, discontinuity patterns and the related intersections are also played an important role  
47 of the size and shape of the detached blocks (Perret et al. 2004).

48  
49 The slope characteristics are very significant factors for the rockfall events. The normal ( $r_n$ )  
50 and tangential ( $r_t$ ) components of coefficient of restitution, are related to the slope  
51 characteristics that control behavior of the falling blocks and they are the most crucial input  
52 parameters for rockfall analyses (Chau et al. 1996). Both components of coefficient of  
53 restitution are related to material covering the surface, vegetation, surface roughness, and  
54 radius of the falling rocks (Dorren et al., 2004). The coefficient of restitution with normal and  
55 tangential components are best determined by the field tests and back analysis of the fallen  
56 blocks. Although many researchers are revealed several techniques to determine the  
57 coefficient of restitutions, these parameters should be identified individually for each side  
58 because of the different geometrical features and mechanical properties of the slopes  
59 (Agliardi and Crosta 2003; Dorren et. al, 2004; Evans and Hungr 1993; Robotham et al.  
60 1995; Pfeiffer and Bowen 1989; Ulusay et al. 2006; Topal et al 2007; Topal et al., 2012, Buzzi  
61 et al 2012). On the other hand, slope inclination and slope properties are also affecting the  
62 runout distances of the falling blocks (Okura et al., 2000). The slope surface of a hard rock  
63 and free from vegetation cover is more dangerous then the surface covered by vegetation or  
64 talus material because of the fact that it does not retard the movement of falling blocks.

65  
66 To simulate fall of a blocks down a slope and to compute rockfall trajectories, various two  
67 dimensional (2D) or tree dimensional (3D) and 2D-3D Discontinuous Deformation Analysis  
68 (DDA) programs have been developed and tested during the last few years and many of  
69 study considering with rockfall analyses and simulations are carried out. Additionally, the  
70 rockfall susceptibility and hazard maps are produced using both two and tree dimensional  
71 rockfall analysis technique considering with mostly traveling distance of falling blocks.  
72 (Bassato et al. 1985; Falcetta 1985; Bozzolo and Pamini 1986; Hoek 1987; Pfeiffer and  
73 Bowen 1989; Azzoni et al. 1995; Jones et al. 2000; Guzetti et al. 2002, Guzetti et al, 2003;  
74 Agliardi and Crosta 2003; Schweigl et al 2003; Perret et al 2004; Yilmaz et al. 2008,

Tunusluoglu and Zorlu 2009, Binal and Ercanoglu 2010; Zorlu et. al 2011; Katz et al 2011; Topal et al 2012; Chen et al. 1994; Keskin 2013).

In this study, rockfall analyses are performed in Ermenek district located on very steep cliffs considering past recorded phenomenon and recently ongoing threats of event (Fig 1). The rockfalls occur very close to residential area and already damaged the houses and unfortunately have been losses of lives. To reveal the rockfall potential of the study area, an extensive field work including detailed discontinuity survey, determination of location and dimensions of hanging, detached and already falling blocks, and also back analyses was carried out. Two dimensional rockfall analyses are conducted along 10 selected profile to assess the block trajectories, runout distance, kinetic energy and bounce high of the blocks, based on field and laboratory test data. Then a rockfall danger zonation map was produced by means of the results obtained from rockfall analyses and areal extension of rockfall was delineated. When considering location, climatic adversities and geological factors of the study area, some remedial measures can be arguable. Despite the unfavourable conditions, possible remedial measures are suggested for the study area.

## **Geological Settings**

The Ermenek basin is one of the Neogene intramontane molasse basin formed in Central Taurides, the orogenic belt's segment stretching between the Isparta angle to west and the Ecemiş Fault to the east (Özgül, 1976; Ilgar and Nemec, 2005). The Ermenek basin and the adjacent Mut Basin lies between the Cukurova basin complex to the east and the Antalya basin complex to the west and is situated within the central part of the Taurides, an E-W trending orogenic belt that originated through compressive deformation during the initial stage of closure of the southern branch of the Neo-Tethyan ocean in the Early Cenozoic (Safak et al. 1997). The basins evolved as extensional grabens related to preexisting fractures. Deposition resumed in Early Miocene time, with Mut basin hosting alluvial sedimentation and the Ermenek basin becoming a large clastic lake. The two basins, formed as separate intermontane depressions, were then inundated by the sea near the end of the Early Miocene and jointly covered with an extensive, thick succession of late Burdigalian-Serravalian carbonates, including reefal and platform limestones (Ilgar and Nemec, 2005).

The tectonic history of Southern Turkey can be summarised into three major periods; (1) Late Palaeozoic to Middle Eocene: formation of the Tethyan orogenic collage. (2) Middle Eocene to Middle Miocene: Tauride Orogeny during continued north-south convergence and collision; migration of deformation front south of Turkey. (3) Late Miocene to recent: collision of

112 Eurasia with the Arabic Plate and start of the Neotectonic Regime (Basnt et al 2005). Due to  
113 this complex tectonic movement the Taurus Belt exhibits very complicate stratigraphic  
114 sequence and litological diversity (Fig 2).

115

116 The basement of the Ermenek basin consists of Paleozoic and Mesozoic units, which are  
117 generally exposed at the southern part of the basin. Palaeozoic units compise of shale,  
118 limestone, dolomitic limestone, and quartzite. While Lower-Middle Triassic units contains  
119 limestone, shale; Upper Triassic units consists of sandstone, conglomerate and limestone;  
120 Jura-Cretaceous time is represented by dolomitic limestone (Gul and Eren, 2003). Eocene  
121 and Palaeocene sedimentary units contain fossiliferous limestone (Tepebasi Formation)  
122 unconformably overlie the Cretaceous limestone and ophiolitic melange. Oligocene lacustrine  
123 deposits represent by Pamuklu Formation including coal layer as Yenimalle Formation,  
124 overlies unconformably Eocene-Oligocene units in the area. The Yenimahalle Formation has  
125 a great lateral extentention in the Ermenek basin consists of six main facies association,  
126 which range from alluvial to offshore lacustrine deposits, up to 300 m in thickness. Middle  
127 and Upper Miocene units unconformably overlie the Lower Miocene unit in the basin are  
128 characterized by Mut, Köselerli and Tekecati Formations. Koselerli Formation comprises  
129 claystone, limestone, clayey limestone, gravelly sandstone and marl deposits representing  
130 centre of the reef (reef core facies). Mut formation also consist of reef limestones deposits in  
131 shallow marine environment including limestone with clayey or fossiliferous, and distinctive  
132 patch reefs are common in this formation (Gul and Eren, 2003). The last unit of the Miocene  
133 age sequence of the basin is Tekecati Formation consists of limestone, fossiliferous  
134 limestone, clayey limestone and mudstone as assessed typically shallow sea sediment  
135 belong to a reefal environment (Yurtsever et al. 2005). All these formations of Middle and  
136 Upper Miocene also interfinger and they have transitional contacts with each other (Fig 3).

137

138 A Digital Elevation Model (DEM) of the study area was constructed by implementation of  
139 contour lines of 1:25,000 scale topographic maps with an equidistance of 10 m. When  
140 considering DEM, the altitude values of the northern and the south-eastern parts of the study  
141 area vary from 1,200 to 1,860 m (Fig 4a), slope gradients exceed 90° from 0° (Fig 4b) and  
142 the general physiographic trend of the study area is about S-SE (Fig 4c)

143

#### 144 **Field investigation and engineering properties of the rock**

145

146 Rockfall events are observed in the very steep cliffs formed by jointed limestone which are  
147 suddenly increased from 1250 m to 1850 m. The limestone of Mut Formation is not form from  
148 a single lithological property it is also formed by succession of different lithologies which is

149 one of the triggering factor of the rock fall events. Owing to its complex lithological structure,  
150 the field studies are also carried out more detailed considering with lithological differences. A  
151 systematic sampling was conducted to determine the lithological and geomechanical  
152 properties of Mut formation with different facieses. Petrographic investigations of the  
153 limestone specimens from the systematic sampling along X-X' line (Fig 5) of formation  
154 consists of routine observations under polarized microscope. According to the results of the  
155 petrographic analyses, the specimens are formed by four lithological units such as,  
156 fossiliferous limestone, claystone-marl, clayey limestone and limestone. The results of  
157 petrographic thin-section analyses are summarized in Table 1.

158  
159 The X-ray diffraction analyses (XRD) are also applied to the specimens to assess the relative  
160 quantity of minerals (Table 1). The XRD diffractograms are obtained at General Directorate of  
161 Mineral Research and Exploration X-Ray Laboratory. The X-ray diffraction and the thin-  
162 section analyses results show it is obvious that Mut formation arise four different litological  
163 units.

164  
165 During the field studies a series of systematic scan-line surveys were carried out to  
166 determine the orientation and spacing of discontinuities based on ISRM (1978) and ISRM  
167 (1981). According to scan-line survey, five main discontinuity sets were determined via  
168 contour diagrams using a computer program, name of DIPS 5.1 (RocScience Inc. 2006). The  
169 dip and dip direction of values of the major sets are 86/154, 85/210, 87/173, 84/077 and  
170 55/155 (Fig 6). The discontinuities have high persistence ( $\geq 20$  m), very tight to very open  
171 aperture (from 0.1 mm to  $\leq 10$  cm) without infilling. The discontinuity surfaces are rough,  
172 undulating and groundwater seepage is not existed through discontinuities surface. The  
173 average spacing value of discontinuities is determined as 170 cm. and the discontinuity  
174 spacing histogram is given in Fig 7.

175  
176 Kinematic analyses of the discontinuities are conducted for western, northern and eastern  
177 slopes of the study area. Kinematic analyses show that two different failure types observed  
178 on the slopes. Although sliding is encountered as a main failure type on the each slope,  
179 toppling type of failure is occurred only western and northern part (Fig 8).

180 During the field work, already fallen and hanging blocks in various dimensions were observed  
181 in the study area. For real approaches at rockfall modeling, size, location and runout distance  
182 of fallen blocks were determined (Fig 9). In addition to various sizes of hanging blocks,  
183 different rockfall source area was also observed during the field study (Fig 10). Besides,  
184 block samples were taken in the field for laboratory test. While taken block sample,  
185 systematic sampling was carried out from bottom to top of slopes due to its different

186 lithological and mineralogical features of Mut formation. The tests performed in the laboratory  
187 are unit weight, apparent porosity, void ratio, water absorption by weight, water absorption by  
188 volume and uniaxial compression strength for each sampling zone. When applying the tests,  
189 the procedures suggested by ISRM (1981) suggested methods are taken into consideration.  
190 The average unit weight of limestone samples ( $23.9 \text{ kN/m}^3$ ) were the highest than the  
191 fossiliferous limestone ( $22.2 \text{ kN/m}^3$ ), claystone-marl ( $20.4 \text{ kN/m}^3$ ), and clayey limestone ( $21.5$   
192  $\text{kN/m}^3$ ) sample. The uniaxial compressive stress values of samples were found vary in a  
193 large range. The average uniaxial compressive strength values of limestone, fossiliferous  
194 limestone and clayey limestone were 55 MPa, 48 MPa and 36 MPa respectively. The  
195 standard core sample can not be extracted from highly weathered zones of claystone-marl  
196 for uniaxial compression tests. To cope with this difficulty, the Schmidt hammer index test  
197 was performed in the field. The average Schmidt hammer rebound number of the claystone-  
198 marl was obtained as 33 and the uniaxial compression strength value was found as 22 MPa  
199 indirectly. The results obtained from the tests with statistical evaluations are given in Table 2.

200

## 201 **Rockfall analyses**

202

203 Various two or three-dimensional computer program are existed to simulate fall of boulder  
204 and compute rockfall trajectories, (Bassato et al. 1985; Falcetta 1985; Bozzolo and Pamini  
205 1986; Hoek 1987; Pfeiffer and Bowen 1989; Azzoni and de Freitas 1995; Jones et al. 2000;  
206 Guzzetti et al. 2002). In this study, rockfall simulations of Ermenek steep cliffs carried out  
207 using Rockfall V.4 software (Rocscience Inc. 2002). Rockfall V.4 is a two-dimensional  
208 software program performing statistical analyses of rockfall and calculation engine behaves  
209 as if the mass of each rock is concentrated in an extremely small circle. While simulate  
210 rockfall trajectories, any size or shape effects must be accounted for by an approximation of,  
211 or adjustments to, other properties (Rockscience Inc. 2002). Some crucial parameters are  
212 required to design block trajectories and rockfall analysis, the coefficient of restitution (normal  
213 and tangential), slope geometry, roughness of slope and weight of hanging blocks. The slope  
214 geometry is revealed from 1/1.000 scale topographic map. When considering lithological  
215 features, distance from settlement district and location of rockfall source areas, ten slope  
216 profile selected for rockfall simulation analysis (Fig 11). In the field study, hanging blocks are  
217 determined and weight of reachable block is calculated by using unit weight and volume of  
218 the rock (Fig 12). The hanging or detached blocks had various dimensions due to the  
219 discontinuity orientation, spacing and their mineralogical composition affected by weathering  
220 processes. The calculated hanging blocks weights vary between 75 kg and 9.800 kg for  
221 different rockfall source areas (see Fig 10). For selected ten profiles, different rock masses  
222 (100 kg, 1.000 kg and 10.000 kg) were used in the rockfall analyses considering block sizes

223 which are ideally represented field conditions. Initial velocity of blocks was preferred 0 m/s in  
224 the analyses considering the situation of the each block.

225

226 The slope characteristics are very important factors for the rockfall event because of the fact  
227 that the slope properties control the behavior of the falling blocks as runout distance of the  
228 blocks (Okura et al. 2000). The slope surfaces was played a considerable role in movement  
229 of falling or rolling blocks moving through the slopes. The slope faces are free from  
230 vegetation cover, they do not retard the movement of blocks. In this case, the blocks can be  
231 reached farther distance, on the contrary of the surface covered by vegetation or talus  
232 material. Because, the vegetation or talus material absorbs a high amount of the energy of  
233 the falling rock and will probably stop it (Hoek 2007). The retarding capacity of the slope  
234 surface material is expressed mathematically normal ( $R_n$ ) and tangential ( $R_t$ ) coefficient of  
235 restitution are affected by the composition of the material covering the surface and slope  
236 roughness. The coefficient of restitutions can be obtained from back analyses in the field or  
237 theoretical estimations (Agliardi and Crosta 2003; Dorren et. al, 2004; Evans and Hungr  
238 1993; Robotham et al. 1995; Pfeiffer and Bowen 1989; Ulusay et al. 2006; Topal et al. 2007).  
239 Back analyses were performed to determine the coefficient of restitution with ten blocks in the  
240 field considering the size and the shape of the blocks and the slope characteristics (Fig 13).  
241 The results of the analyses, normal and tangential coefficients of restitution values belong the  
242 fallen rocks are determined as  $(0.33 \pm 0.04)$  and  $0.63 \pm 0.19$  respectively. In addition to  
243 coefficients of restitution, friction angle was determined by field back analyses as  $32.5^\circ$ .  
244 During the rockfall analyses 1.000 rock blocks were thrown. The slope roughness which is  
245 another input parameter of rockfall simulation analyses was taken as  $2^\circ$  in based on the  
246 angle between rough surfaces. The input parameters used for rockfall analyses are given in  
247 Table 3.

248

249 Rockfall simulation analyses were performed ten profiles as mentioned above. The limestone  
250 and fossiliferous limestone units resisting against weathering, upper zones of weaker  
251 lithological unit claystone-marl accepted as rockfall source areas, based on field conditions  
252 (Fig 14). During the rockfall analyses, different rock masses (100 kg, 1.000 kg, 10.000 kg)  
253 were used for each profiles considering the real masses of hanging blocks in the study area.  
254 One of the typical examples of a rockfall trajectory is given in Fig. 15 .The runout distance,  
255 bounce height, kinetic energy and velocity of the blocks were predicted by rockfall analyses.  
256 According to the results of the analyses, maximum runout distance reaches 660 m, kinetic  
257 energy 1.750.000 kJ and velocity is 46.3 m/s for the free falling of the 1000 kg blocks. The  
258 results of analyses are summarized in Table 4. A rockfall danger zone map was produced by  
259 using the results obtained from rockfall analyses considering maximum runout distance of

falling blocks Fig 16. According to map, areal extension of all blocks for each profile would be able to reach to the roads or settlement area. It is apparent that the settlement area was located in the danger zone. Although some preventative measures can be applied to reduce rockfall hazard, it was directly depend on topographical and lithological factors of the potential rockfall source area. Also the aesthetic and socio-economic conditions were limited to the existing preventative measurements. Construction of trenches, retaining walls (barrier), wire meshes, cable/streching nets, rock bolting and evacuation of the danger zone can be used as preventive measures in the rockfall areas. But, the most widely-known remedial measures in literature are not proper in the study area, due to topographical and lithological features. Thus, to apply trenching and fencing is not possible due to the big size of hanging blocks have relatively high kinetic energy and bounce height. Rock bolting can not be applied higher elevations because the slopes have considerably steep cliffs and large block sizes. Therefore, it is recommended that the hanging blocks in the reachable locations should removed taking safety measures. Although total evacuation of the danger zone is not preferred by the residents, in opinion of the authors of this study, it is indispensable in the study area.

## **Results and conclusions**

Ermenek is a spectacular settlement area located in very steep cliffs with a height of 1850 m. The settlement was subjected to rockfall event several times and resulted in loss of life and property. During the fieldwork and depending on laboratory test results, the rockfalls were initiated by discontinuities, weathering process and characteristics of limestone having different lithological facieses. Considering the scan-line survey, five main discontinuity sets were determined. To understand of rockfall mechanism, relevant with lithological features, X-ray diffraction and thin-section analyses were taken into consideration and revealed that the limestone formation are formed by four lithological units such as, fossiliferous limestone, claystone-marl, clayey limestone and limestone. Thus rockfall occurs uppermost level of limestone and fossiliferous limestone due to existence of weaker claystone-marl at the lower level of the facies.

Two dimensional rockfall analyses were performed using the data collected from field study and laboratory test results along 10 profiles. Rockfall analyses were indicated that the roads and the settlement area were remaining in the rockfall danger zone. It is not possible to apply known protection techniques (trenches, barriers, wire meshes, cable/streching nets and rock bolting etc.) in the study area due to considerably big size of blocks and their kinetic energy.



297 According to field observations, the existing trenches were insufficient for rockfall protection.  
298 Considering the negative effects mentioned above and topographical/ lithological limitations,  
299 commonly used remedial measures are not preferred in present study. Total evacuation and  
300 cleaning the loose blocks in accessible locations are recommended.

301

## 302 **Acknowledgment**

303

304 This research is supported by The Scientific and Technological Research of Turkey,  
305 TUBITAK (Project No:107Y071).

306

## 307 **References**

308

- 309 Agliardi F, Crosta GB: High resolution three-dimensional numerical modelling of rockfalls. *Int*  
310 *J Rock Mech Min Sci* 40, 455–471, 2003.
- 311 Azzoni A, de Freitas MH: Experimentally gained parameters, decisive for rockfall analysis.  
312 *Rock Mech Rock Eng* 28, 111–124, 1995.
- 313 Bassant, P., van Buchem, F.S.P., Strasser, A. and Gfrqr, N: The stratigraphic architecture  
314 and evolution of the Burdigalian carbonate–siliciclastic sedimentary systems of the Mut  
315 basin, Turkey. *Sedimentary Geology* 173, 121–150, 2005.
- 316 Bassato G, Cocco S, Silvano S: Programma di simulazione per lo scoscendimento di blocchi  
317 rocciosi. *Dendronatura* 6, 34–36, 1985.
- 318 Bozzolo D, Pamini R: Modello matematico per lo studio della caduta dei massi. Laboratorio di  
319 Fisica Terrestre ICTS. Dipartimento Pubblica Educazione, Lugano-Trevano, 1986.
- 320 Binal A, Ercanog˘lu M: Assessment of rockfall potential in the Kula (Manisa, Turkey) Geopark  
321 Region. *Environ Earth Sci* 61, 1361–1373, 2010.
- 322 Buzzi O, Giacomini A, Spadari M: Laboratory investigation on high values of restitution  
323 coefficient *Rock Mech Rock Eng* 45, 35–43, 2012.
- 324 Chau KT, Wong RHC, Lee CF: Rockfall problems in Hong Kong and some new experimental  
325 results for coefficient of restitution. *Int J Rock Mech Min Sci* 35, 662–663, 1996.
- 326 Chen H, Chen RH, Huang T: An application of an analytical model to a slope subject to  
327 rockfalls *Bull As Eng Geol* 31, 447–458, 1994.
- 328 Dorren LKA A review of rockfall mechanics and modeling approaches. *Prog Phys Geogr* 27,  
329 69–87, 2003.
- 330 Dorren LKA, Maier B, Putters US, Seijmonsbergen AC: Combining field and modelling  
331 techniques to assess rockfall dynamics on a protection forest hillslope in the European  
332 Alps. *Geomorphology* 57, 151–167, 2004.
- 333 Evans SG, Hungr O: The assessment of rockfall hazard at the base of talus slopes. *Can*  
334 *Geotech J* 30, 620–636, 1993.
- 335 Falcetta JL: Un nouveau modeˆle de calcul de trajectoires de blocs rocheux. *Revue*  
336 *Francaise de Geotechnique* 30, 11–17, 1985.
- 337 Guzetti F, Crosta G, Detti R, Agliardi F: STONE: a computer program for the three-  
338 dimensional simulation of rockfalls. *Comput Geosci* 28, 1079–1093, 2002.
- 339 Guzetti F, Reichenbach P, Wieczorek GF: Rockfall hazard and risk assessment in the  
340 Yosemite Valley, California, USA. *Nat Hazards Earth Syst Sci* 3, 491–503, 2003.
- 341 Gul M and Eren M: The sedimentary characteristics of Dagpazarı patch reef (Middle Miocene,  
342 Mut-Icel/Turkey) *Carbonates and Evaporites* 18, 51–62, 2003.
- 343 Hoek E: Rockfall—a program in BASIC for the analysis of rockfall from slopes. Unpublished  
344 note, Golder Associates/ University of Toronto, Canada, 1987.
- 345 Hoek E: Practical rock engineering. Course note, 2007.

- Ilgar, A. and Nemec, W: Early Miocene lacustrine deposits and sequence stratigraphy of the Ermenek Basin, Central Taurides, Turkey. *Sedimentary Geology*, 173, 233–275, 2005.
- Jones CL, Higgins JD, Andrew RD: Colorado rockfall simulation program version 4.0. Colorado Department of Transportation, Colorado Geological Survey, 2000.
- Katz O, Reichenbach P, Guzzetti F: Rock fall hazard along the railway corridor to Jerusalem, Israel in the Soreq and Refaim valleys. *Nat Hazards* 56, 649–665, 2011
- Keskin I: Evaluation of rock falls in an urban area: the case of Boğazici (Erzincan/Turkey) *Environ Earth Sci* 70, 1619–1628, 2013.
- Okura Y, Kitahara H, Sammori T, Kawanami A: The effects of rockfall volume on runout distance. *Eng Geol* 58, 109–124, 2000.
- Özgül, N: Torosların bazı temel jeoloji özellikleri. *Türkiye Jeol. Kur. Bült.*, 19, 65-78, 1976.
- Perret S, Dolf F, Kienholz H: Rockfalls into forest: analysis and simulation of rockfall trajectories-consideration with respect to mountainous forest in switzerland. *Landslides* 1, 123–130, 2004.
- Pfeiffer TJ, Bowen TD: Computer simulation of rockfalls. *Bull Assoc Eng Geol* 1, 135– 146, 1989.
- Robotham ME, Wang H, Walton G: Assessment of risk from rockfall from active and abandoned quarry slopes. *Trans Inst Min Metall* 104, A25–A33, 1995.
- Rocscience: RocFall software—for risk analysis of falling rocks on steep slopes. Rocscience user's guide, p 59, 2002.
- Schweigl J, Ferretti C, Noëssing L: Geotechnical characterization and rockfall simulation of slope: a practical case study from South Tyrol (Italy). *Eng Geol* 67, 281–296, 2003.
- Şafak, Ü: Karaman yöresi Üst Miyosen-Pliyosen istifinin ostrakoda faunası ve ortamsal yorumu. *MTA Dergisi*, 119, 89-102, 1997.
- Topal T, Akin M, Ozden AU: Assessment of rock fall hazard around Afyon Castle, Turkey. *Environ Geol* 53, 177–189, 2007.
- Topal T, Akin M. K., Akin M: Rockfall hazard analysis for an historical Castle in Kastamonu (Turkey), *Natural Hazards* 62, 255-274, 2012.
- Tunusluoglu MC, Zorlu K: Rockfall hazard assessment in a cultural and natural heritage (Ortahisar Castle, Cappadocia, Turkey). *Environ Geol* 56, 963–972, 2009.
- Ulusay R, Gokceoglu C, Topal T, Sonmez H, Tuncay E, Erguler ZA, Kasmer O: Assessment of environmental and engineering geological problems for the possible re-use of an abandoned rock-hewn settlement in Urgup (Cappadocia) Turkey. *Environ Geol* 50, 473–494, 2006.
- Varnes DJ: Slopemovement types and processes. In: Schuster RL, Krizek RJ (ed) *Landslides, analysis and control*. Transportation and Road Research Board, National Academy of Science, Washington, DC, pp 11–33, 1978.
- Whalley WB: Rockfalls. In: Brunsden D, Prior DB (eds) *Slope stability*. Wiley, New York, pp 217–256, 1984.
- Yilmaz I, Yildirim M, Keskin I: A method for mapping the spatial distribution of RockFall computer program analyses results using ArcGIS software. *Bull Eng Geol Environ* 67, 547–554, 2008.
- Yurtsever, T.Ş., Ilgar, A. ve Gürçay, B: Ermenek (Karaman)-Mut-Gülınar (İçel) Arasında Kalan Tersiyer Havzasının Jeolojik Ve Sedimantolojik İncelenmesi. MTA Rapor No:10776 (Unpublished), 2005.
- Zorlu K, Tunusluoglu MC, Gorum T, Nefeslioglu HA, Yalcin A, Turer D, Gokceoglu C: Landform effect on rockfall and hazard mapping in Cappadocia (Turkey). *Environ Earth Sci* 62, 1685–1693, 2011.

401 List of Tables

402

403 **Table 1** Results of the thin-section petrographic and X-ray analyses

404 **Table 2** Laboratory and field test results

405 **Table 3** Input parameters used in the rockfall analyses

406 **Table 4** Results of the rockfall analyses

407 **Table 5** Results of the coefficient of restitutions obtained from back analysis in the field

408

409

410

411

412

413

414

415

416

417

418

419

420

421

422

423

424

425

426

427

428

429

430

431

432

433

434

435

**Table 1** Results of the thin-section petrographic and X-ray analyses

| Specimen No | Petrographic description | X-ray analysis result                 | Microscopic photograph                                                                |
|-------------|--------------------------|---------------------------------------|---------------------------------------------------------------------------------------|
| HK05-1      | Limestone                | Calcite, Quartz                       | 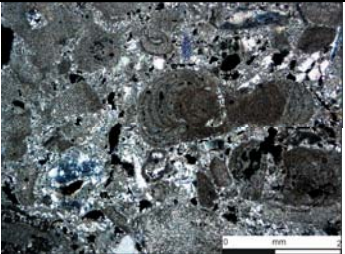   |
| HK05-2      | Clayey Limestone         | Calcite, Quartz<br>Chlorite, Dolomite |    |
| HK05-3      | Claystone-Marl           | Calcite, Dolomite,<br>Simectite       |   |
| HK05-5      | Fossiliferous Limestone  | Calcite, Dolomite                     |  |

Table 2 Laboratory and field test results

|                                     | Limestone |      |         |                    | Clayey limestone |       |         |                    | Claystone-Marl |       |         |                    | Fossilliferous Limestone |      |         |                    |
|-------------------------------------|-----------|------|---------|--------------------|------------------|-------|---------|--------------------|----------------|-------|---------|--------------------|--------------------------|------|---------|--------------------|
|                                     | Max.      | Min. | Average | Standart Deviation | Max.             | Min.  | Average | Standart Deviation | Max.           | Min.  | Average | Standart Deviation | Max.                     | Min. | Average | Standart Deviation |
| Unit weight (kN/m³)                 | 24,3      | 23,2 | 23,9    | 0,31               | 22,0             | 21,2  | 21,5    | 0,22               | 20,7           | 20,2  | 20,4    | 0,19               | 23,6                     | 20,5 | 22,2    | 0,99               |
| Void ratio (%)                      | 7,26      | 3,70 | 5,33    | 1,16               | 19,05            | 16,62 | 17,67   | 0,77               | 24,37          | 20,02 | 21,47   | 1,28               | 21,99                    | 7,36 | 11,88   | 3,40               |
| Porosity (%)                        | 6,77      | 3,57 | 5,05    | 0,96               | 16,00            | 14,25 | 14,98   | 0,55               | 19,59          | 16,68 | 17,67   | 0,86               | 18,02                    | 6,85 | 10,47   | 3,77               |
| Water absorption by weight (%)      | 2,86      | 1,45 | 2,07    | 0,42               | 7,39             | 6,48  | 6,81    | 0,29               | 9,44           | 7,89  | 8,48    | 0,44               | 8,63                     | 2,86 | 4,70    | 1,97               |
| Water absorption by volume (%)      | 6,77      | 3,57 | 5,05    | 0,96               | 16,00            | 14,25 | 14,98   | 0,55               | 19,59          | 16,68 | 17,67   | 0,86               | 18,02                    | 2,86 | 10,47   | 3,77               |
| Uniaxial compressive strength (MPa) | 73,4      | 46,2 | 55,3    | 10,58              | 39,8             | 32,4  | 36,1    | 2,57               | 27,4           | 18,1  | 22,2    | 3,90               | 59,6                     | 29,4 | 48,1    | 12,08              |
| Schmidt hammer rebound number       |           |      | 55      |                    |                  |       | 39      |                    |                |       | 25      |                    |                          |      | 48      |                    |
| Number of Samples                   |           |      | 13      |                    |                  |       | 11      |                    |                |       | 11      |                    |                          |      | 10      |                    |

448  
449  
450  
451  
  
  
  
  
  
  
  
  
  
  
  
452  
453

**Table 3** Input parameters used in the rockfall analyses

| Parameter                             | Value     |
|---------------------------------------|-----------|
| Number of rockfall                    | 1000      |
| Minumun velocity cut off (m/s)        | 0.1       |
| Coefficient of normal restitution     | 0.33±0.04 |
| Coefficient of tangential restitution | 0.63±0.19 |
| Friction angle( $\Phi$ )              | 32.5°     |
| Slope roughness                       | 2         |
| Initial velocity (m/s)                | 0 ± 0.5   |

454  
455

**Table 4** Results of the rockfall analyses

| Profile Number | Maximum Slope Height (m) | Weight of block (kg) | Runout distance (m) |     | Bounce height (m) |      | Kinetic energy(kJ) |         | Velocity (m/s) |       |
|----------------|--------------------------|----------------------|---------------------|-----|-------------------|------|--------------------|---------|----------------|-------|
|                |                          |                      | Max                 | Min | Max               | Min  | Max                | Min     | Max            | Min   |
| 1              | 88                       | 100                  | 683                 | 170 | 7                 | 0,5  | 14000              | 1000    | 16             | 1,456 |
|                |                          | 1000                 | 585                 | 195 | 3                 | 0,5  | 120000             | 5000    | 14             | 2,459 |
|                |                          | 10000                | 480                 | 160 | 7,25              | 0,5  | 1400000            | 10000   | 16             | 2,460 |
| 2              | 33                       | 100                  | 535                 | 233 | 2,8               | 0,5  | 2200               | 1025    | 6,3            | 2,460 |
|                |                          | 1000                 | 280                 | 233 | 3                 | 0,5  | 18200              | 1247    | 7,21           | 1,461 |
|                |                          | 10000                | 277                 | 222 | 3,2               | 0,45 | 62033              | 6300    | 3,27           | 1,03  |
| 3              | 334                      | 100                  | 272                 | 115 | 13,25             | 1,23 | 14027              | 60150   | 16,29          | 8,23  |
|                |                          | 1000                 | 275                 | 48  | 19                | 2    | 1750000            | 7350    | 46,3           | 8,23  |
|                |                          | 10000                | 263                 | 72  | 108,5             | 13,5 | 11200000           | 860000  | 63,5           | 9,87  |
| 4              | 145                      | 100                  | 323                 | 75  | 68,3              | 4,3  | 34500              | 6350    | 28,43          | 3,45  |
|                |                          | 1000                 | 312                 | 80  | 11,8              | 3,05 | 583400             | 54000   | 34,42          | 3,02  |
|                |                          | 10000                | 325                 | 82  | 13,8              | 6,32 | 6973000            | 425000  | 33,25          | 2,1   |
| 5              | 123                      | 100                  | 273                 | 32  | 57,32             | 11,3 | 64300              | 8920    | 36,32          | 12,32 |
|                |                          | 1000                 | 281                 | 40  | 68,32             | 4,06 | 670000             | 33000   | 33,24          | 4,2   |
|                |                          | 10000                | 283                 | 45  | 68,3              | 4,23 | 6270000            | 4350000 | 33,5           | 6,7   |
| 6              | 103                      | 100                  | 235                 | 12  | 8                 | 2    | 102500             | 5000    | 46             | 3,8   |
|                |                          | 1000                 | 232                 | 11  | 6,4               | 1,8  | 958000             | 5800    | 45             | 4,2   |
|                |                          | 10000                | 88                  | 43  | 18                | 3,2  | 10500000           | 560000  | 43,5           | 3,8   |
| 7              | 336                      | 100                  | 7,8                 | 2,8 | 1,2               | 0,2  | 8320               | 1823    | 12             | 5     |
|                |                          | 1000                 | 7,5                 | 1   | 1,1               | 0,18 | 83000              | 31000   | 11,5           | 7     |
|                |                          | 10000                | 7,6                 | 1,2 | 0,8               | 0,2  | 7000000            | 480000  | 11,5           | 3     |
| 8              | 104                      | 100                  | 77                  | 23  | 15                | 3,8  | 14300              | 3200    | 16,7           | 2,9   |
|                |                          | 1000                 | 76                  | 24  | 55                | 12   | 870000             | 38000   | 45             | 5     |
|                |                          | 10000                | 34                  | 27  | 57                | 8    | 8650000            | 43000   | 42             | 7     |
| 9              | 95                       | 100                  | 249                 | 215 | 18                | 3    | 72000              | 11000   | 38             | 11,5  |
|                |                          | 1000                 | 248                 | 235 | 21                | 3,2  | 630000             | 42000   | 36             | 8     |
|                |                          | 10000                | 248                 | 234 | 24,5              | 0,5  | 7120000            | 1050000 | 37             | 12    |
| 10             | 68                       | 100                  | 670                 | 480 | 1,9               | 0,5  | 24500              | 1800    |                |       |
|                |                          | 1000                 | 660                 | 510 | 2,4               | 0,5  | 653000             | 43500   | 34,5           | 5,2   |
|                |                          | 10000                | 660                 | 512 | 3                 | 0,25 | 6250000            | 254000  | 34             | 4,3   |

**Table 5** Results of the coefficient of restitutions obtained from back analysis in the field

| Profile                   | Coefficient of restitutions |                 | Friction angle<br>(°) |
|---------------------------|-----------------------------|-----------------|-----------------------|
|                           | Normal (Rn)                 | Tangential (Rt) |                       |
| <b>1</b>                  | 0,34                        | 0,53            | 24,00                 |
| <b>2</b>                  | 0,29                        | 0,58            | 39,50                 |
| <b>3</b>                  | 0,32                        | 0,69            | 25,21                 |
| <b>4</b>                  | 0,28                        | 0,42            | 11,00                 |
| <b>5</b>                  | 0,32                        | 0,80            | 53,00                 |
| <b>6</b>                  | 0,35                        | 0,82            | 54,00                 |
| <b>7</b>                  | 0,36                        | 0,78            | 16,00                 |
| <b>8</b>                  | 0,34                        | 0,87            | 58,00                 |
| <b>9</b>                  | 0,30                        | 0,35            | 70,00                 |
| <b>10</b>                 | 0,40                        | 0,47            | 63,00                 |
| <b>Maximum</b>            | 0,40                        | 0,87            | 70,00                 |
| <b>Minimum</b>            | 0,28                        | 0,35            | 11,00                 |
| <b>Average</b>            | 0,33                        | 0,63            | 41,47                 |
| <b>Standart Deviation</b> | 0,04                        | 0,19            | 20,97                 |



## List of figures

**Fig.1** Location map of the study area

**Fig.2** General view of the study area

**Fig.3** Geological map of the Ermenek region

**Fig.4** Maps of the study area, and their distributions of (a) altitude, (b) slope gradient, (c) slope aspect

**Fig.5** Systematic sampling locations along X-X' line

**Fig.6** Contour diagram of major discontinuity sets

**Fig.7** Discontinuity spacing histogram

**Fig.8** Kinematic analysis results of the slopes

**Fig.9** Fallen blocks and their sizes

**Fig.10** Rockfall source areas of the Ermenek region

**Fig.11** Rockfall profiles analyzed in the study area

**Fig.12** Photograph showing hanging blocks and their location in the study area

**Fig.13** Back analyses in the field to determine the coefficient of restitutions

**Fig.14** Distribution of fallen and hanging blocks of the rockfall source areas

**Fig.15** An example for the rockfall analyses results (a) runout distance (b) total kinetic energy (c) bounce height (d) the typical rockfall trajectory

**Fig.16** The map showing the rockfall danger zone of study area

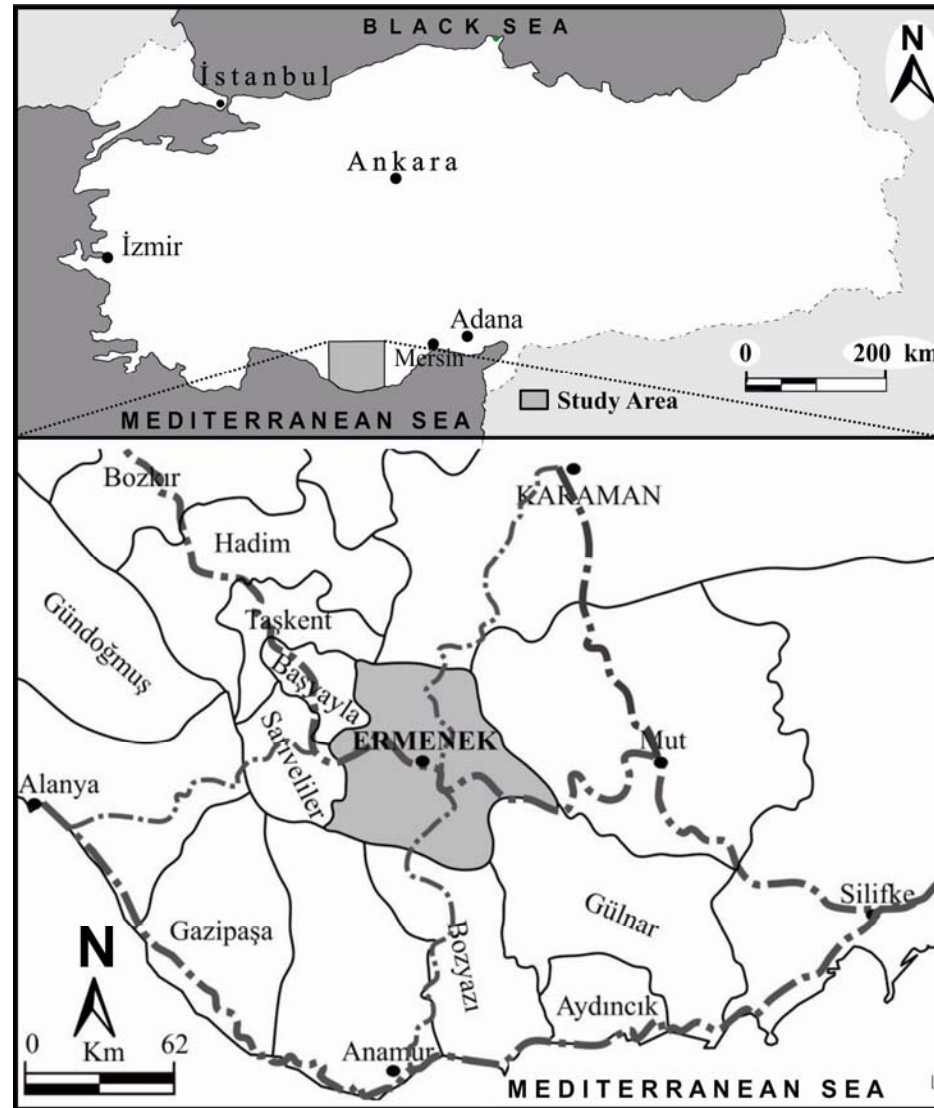

**Fig.1** Location map of the study area

521

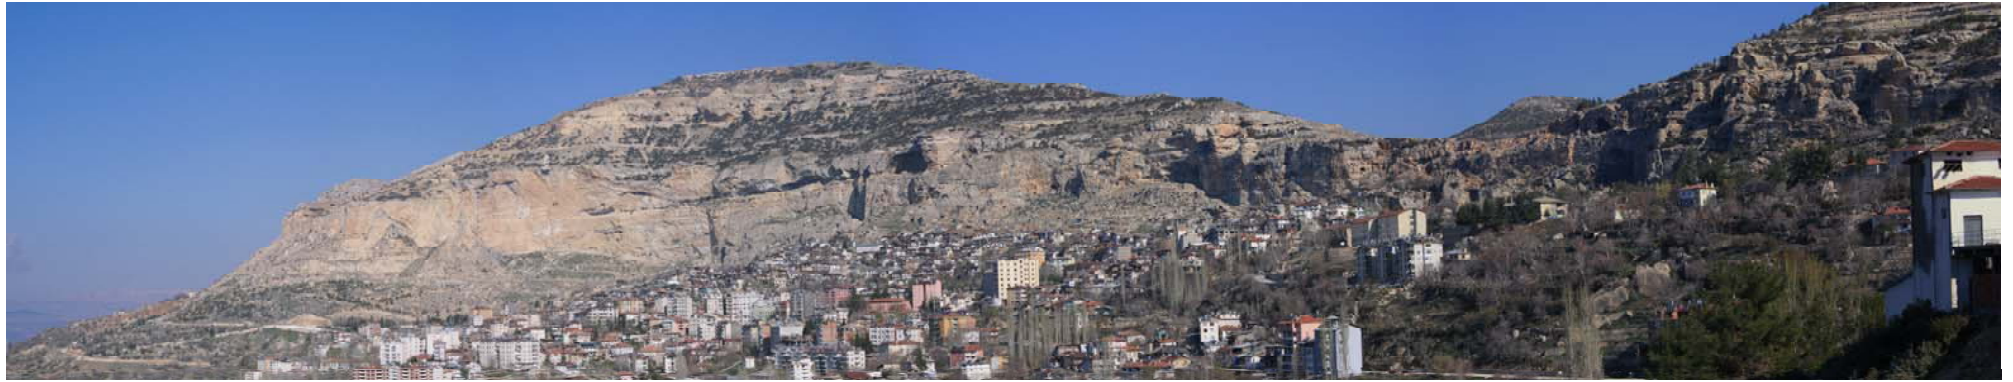

522

523

524

525

526

**Fig.2** General view of the study area

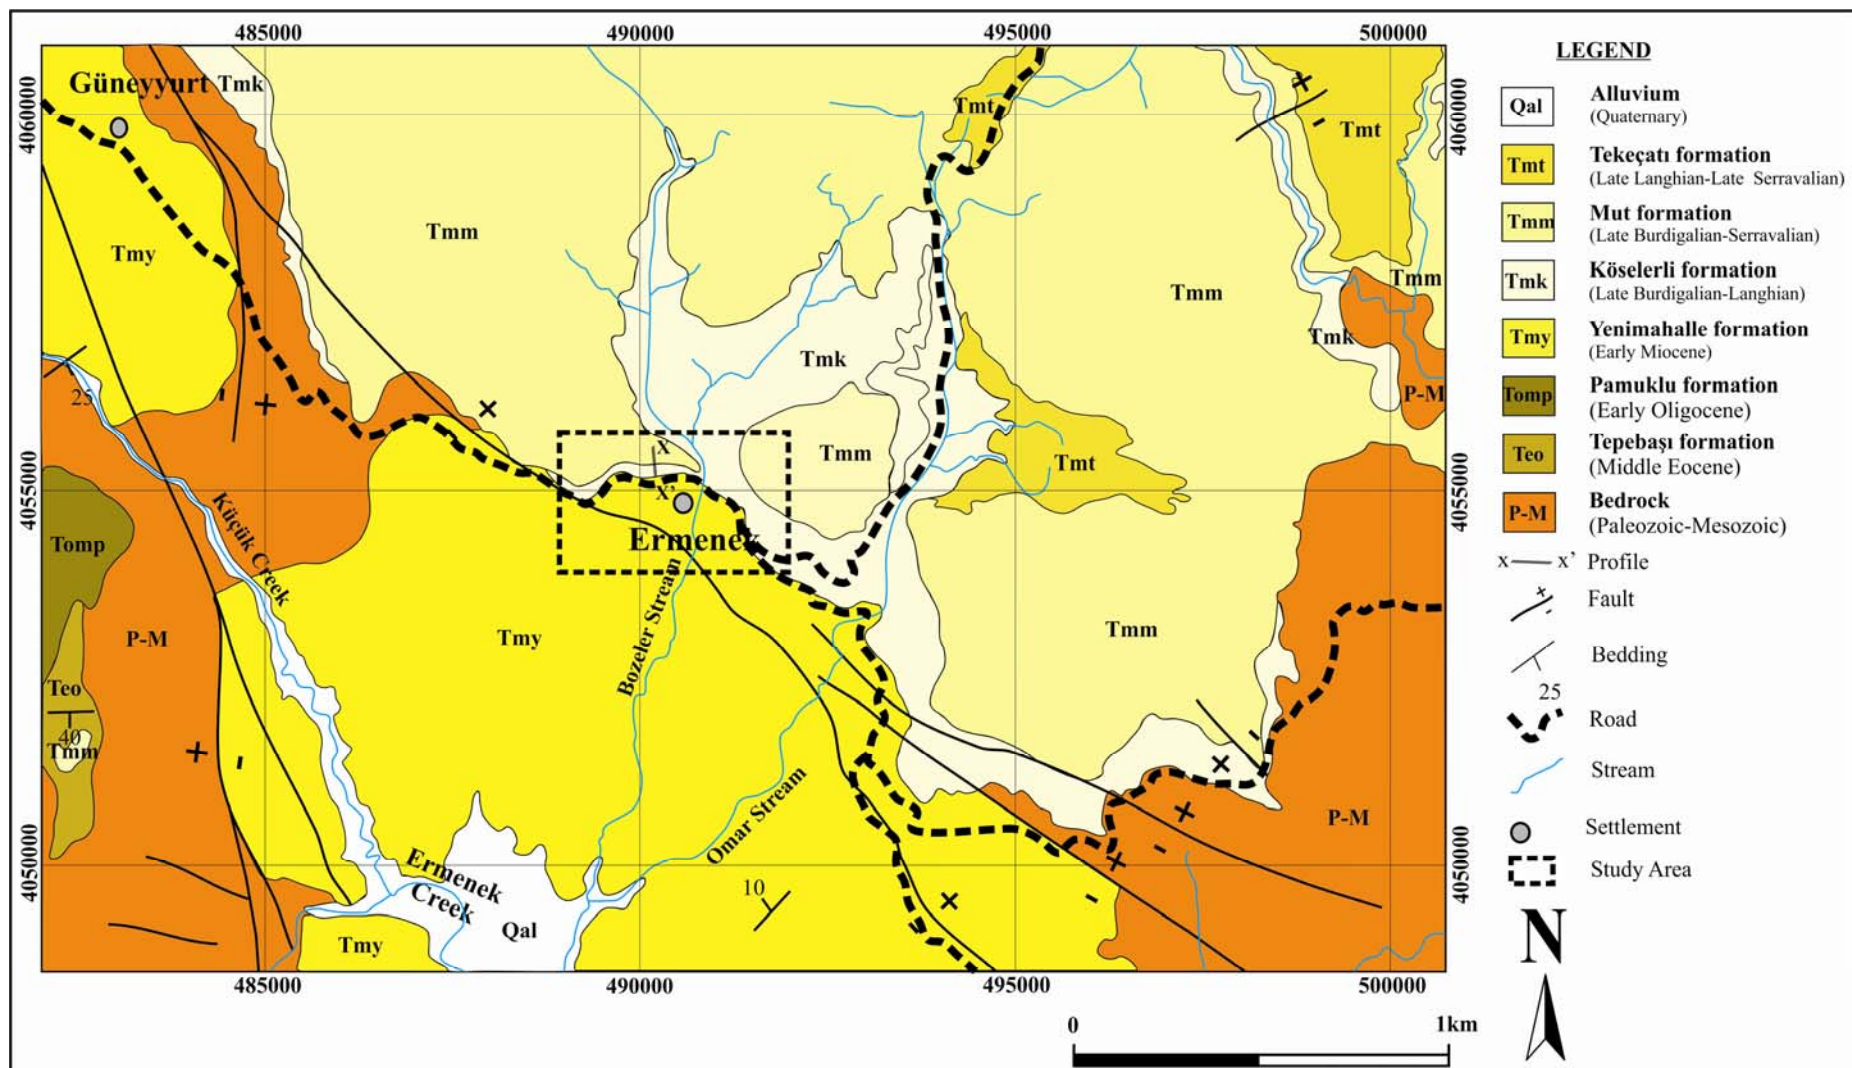

**Fig.3** Geological map of the Ermenek region



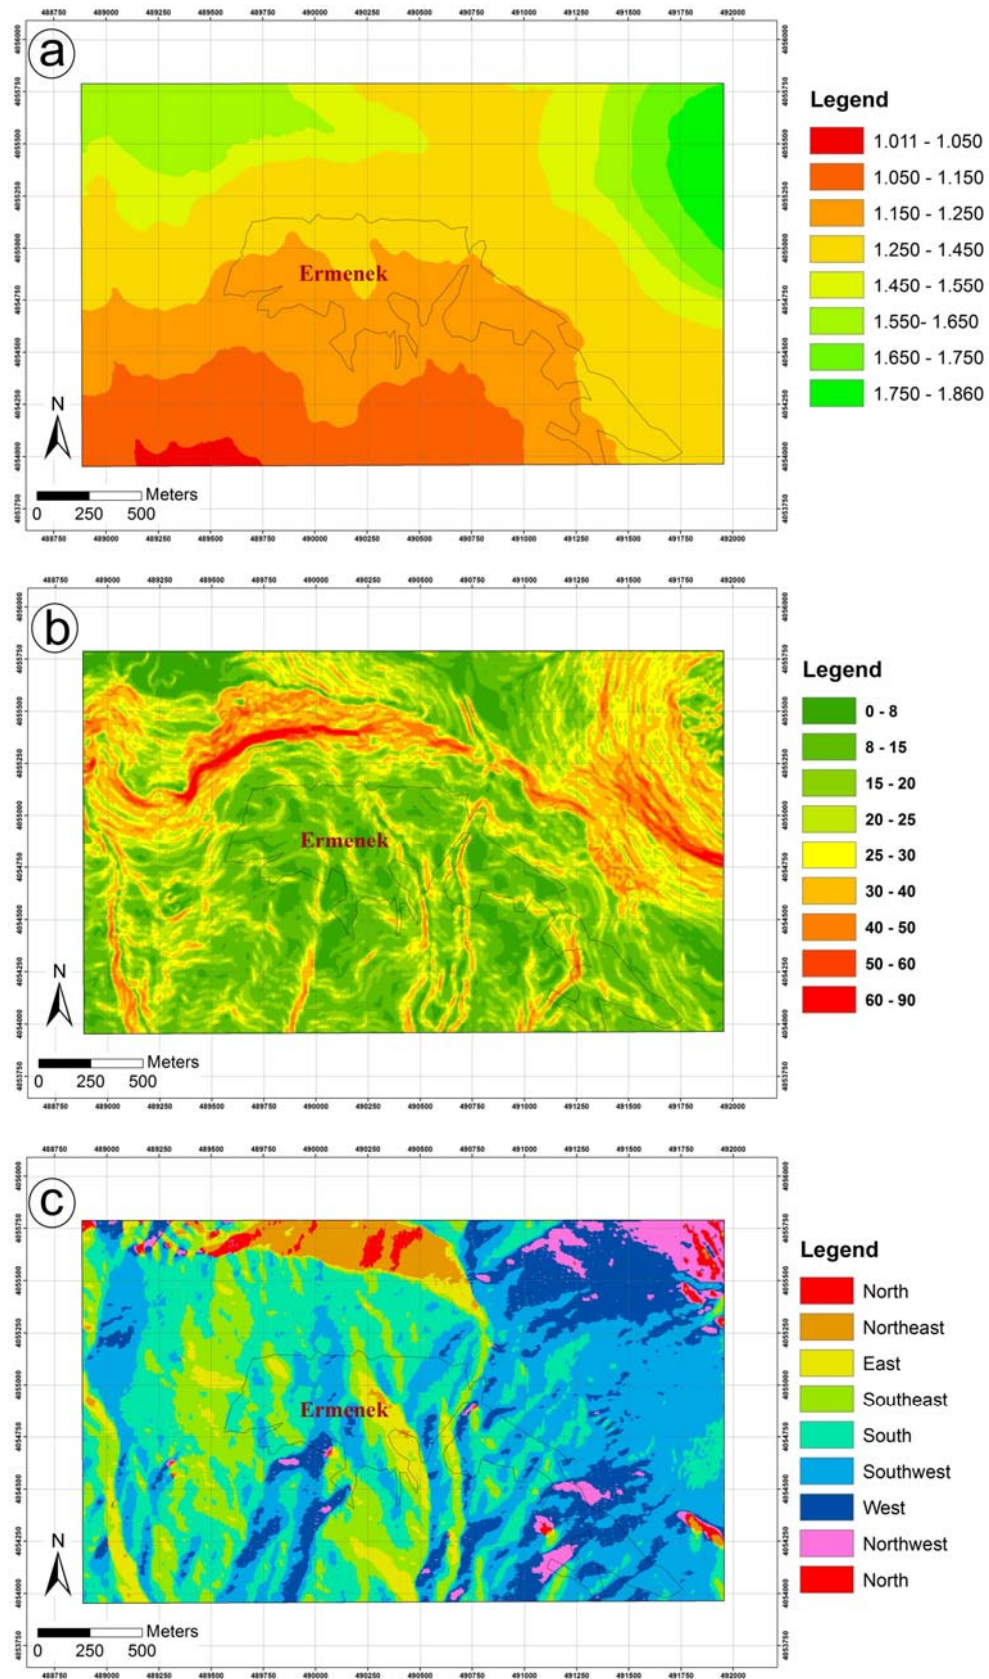

**Fig.4** Maps of the study area, and their distributions of (a) altitude, (b) slope gradient, (c) slope aspect

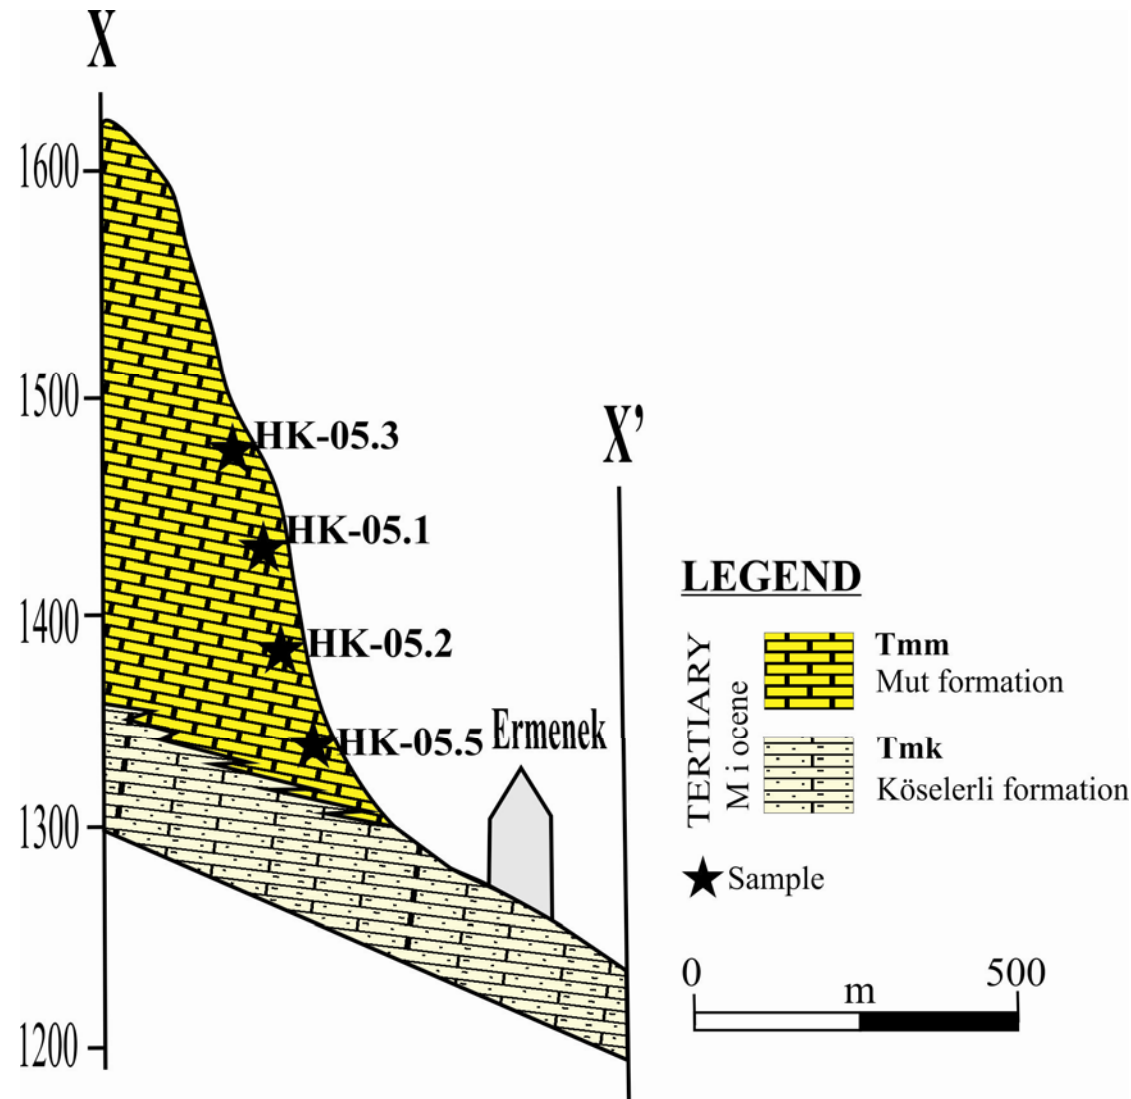

**Fig.5** Systematic sampling locations along X-X' line

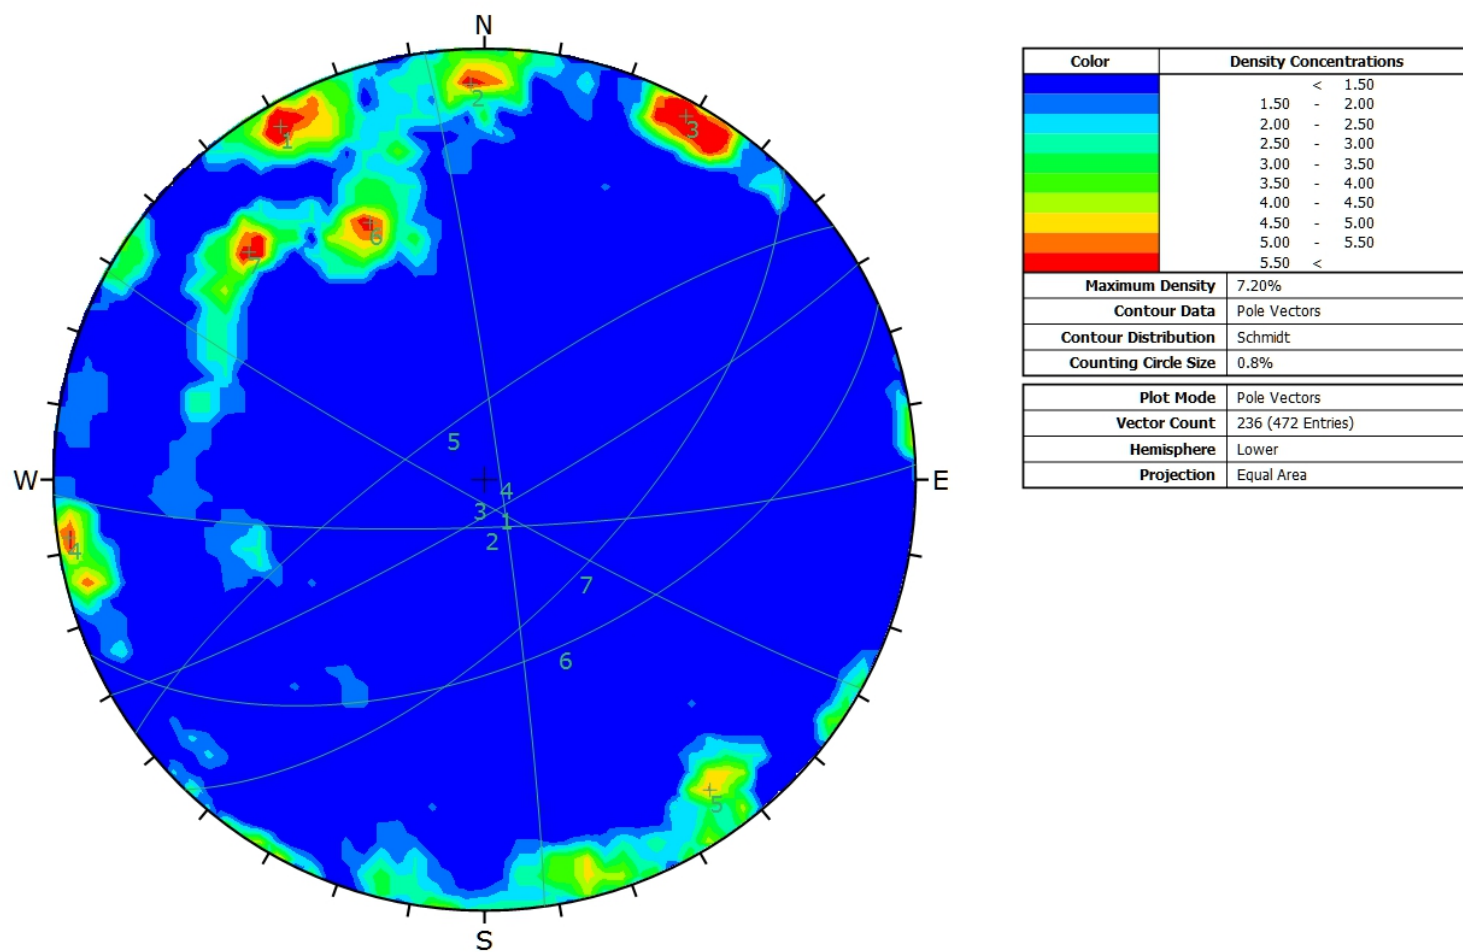

**Fig.6** Contour diagram of major discontinuity sets

541

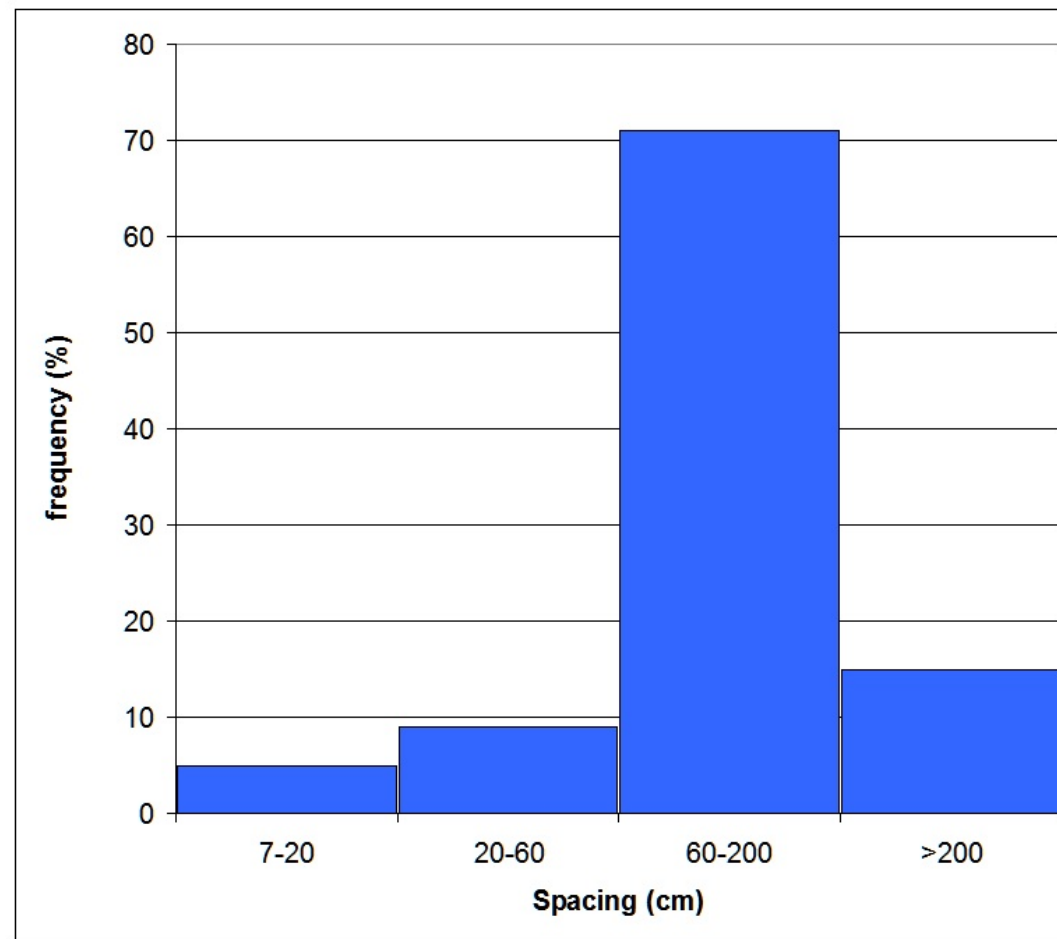

**Fig.7** Discontinuity spacing histogram

542

543

544



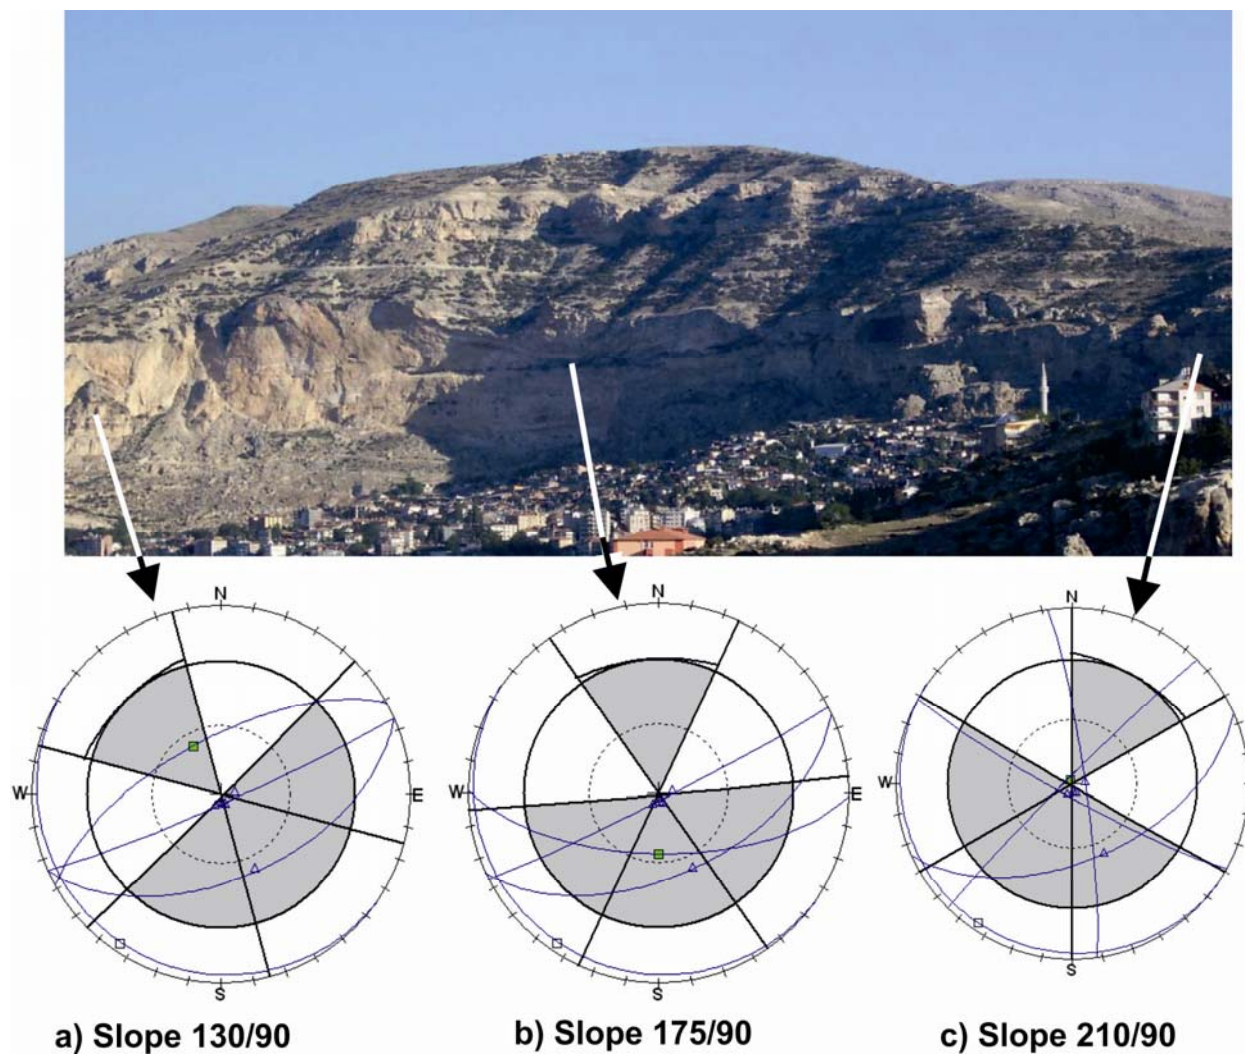

**Fig.8** Kinematic analysis results of the slopes

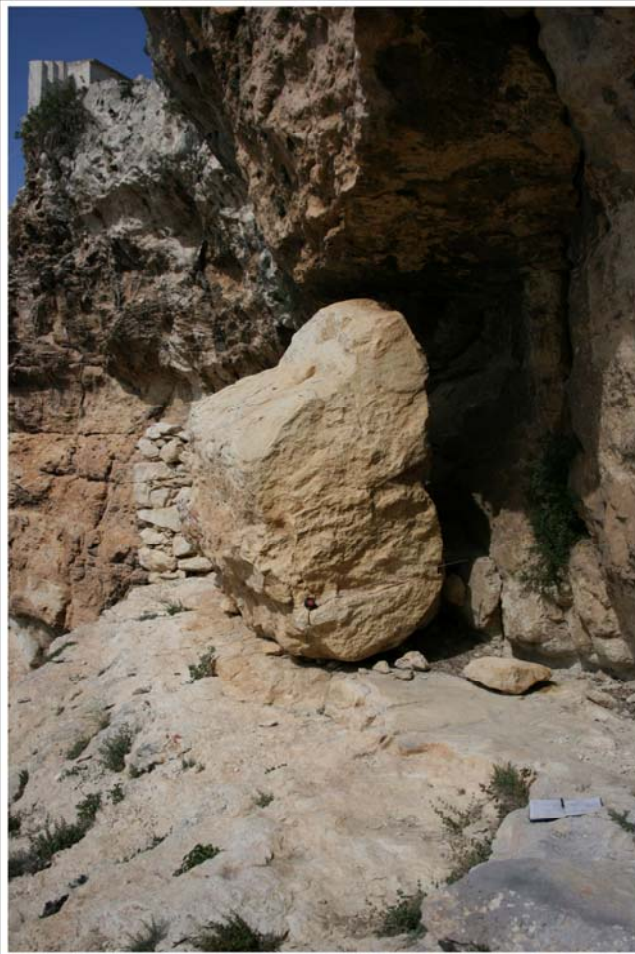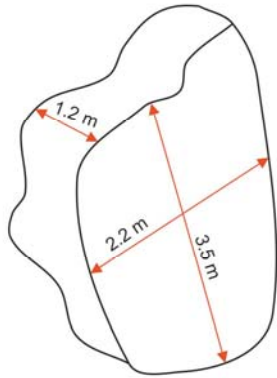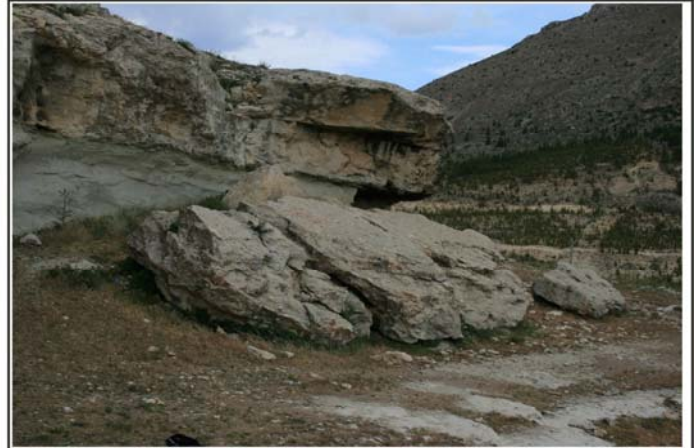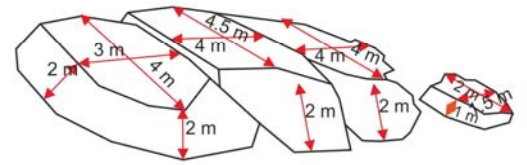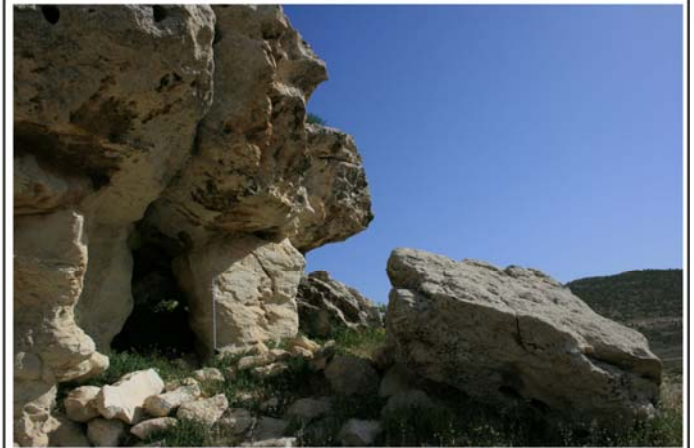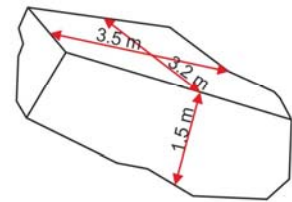

**Fig.9** Fallen blocks and their sizes



551

552

553

554

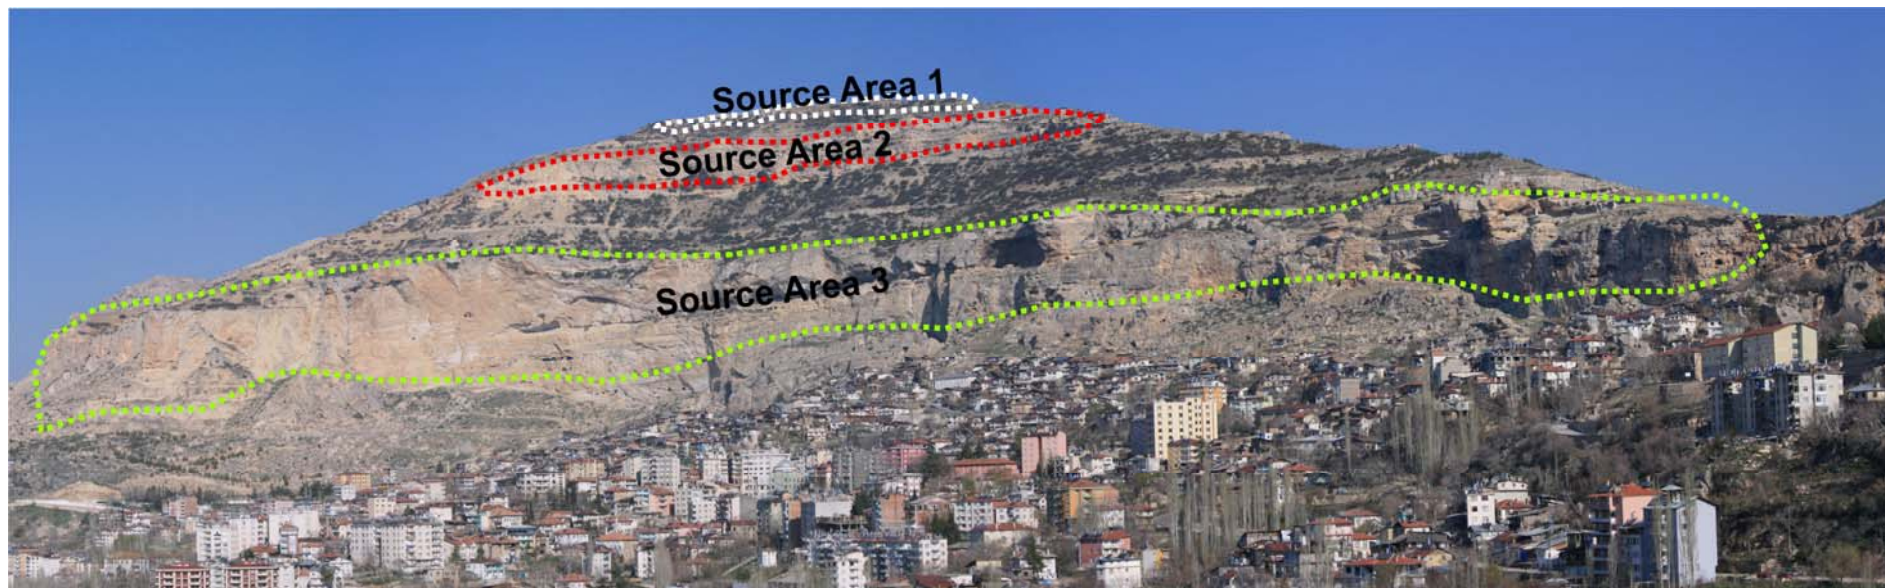

555

556

557

**Fig.10** Rockfall source areas of the Ermenek region

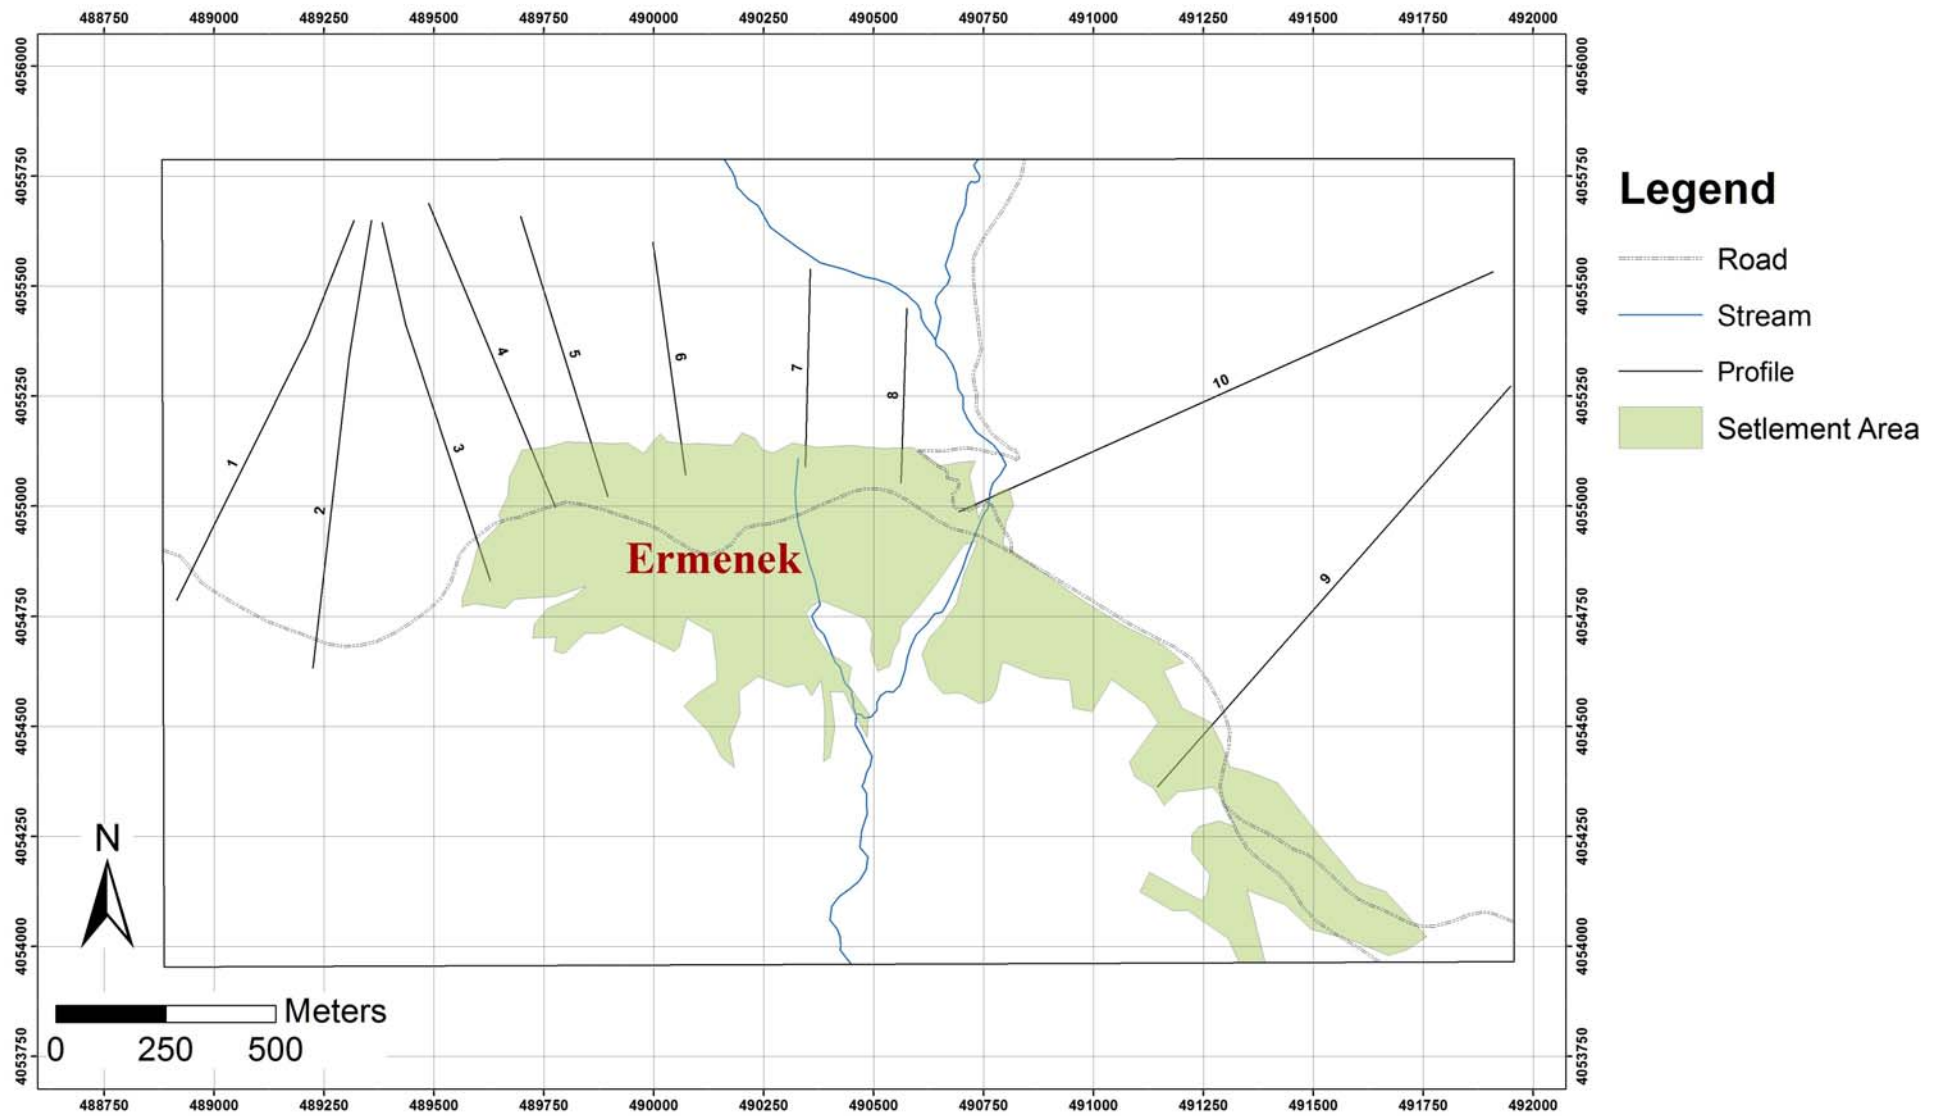

Fig.11 Rockfall profiles analyzed in the study area



560

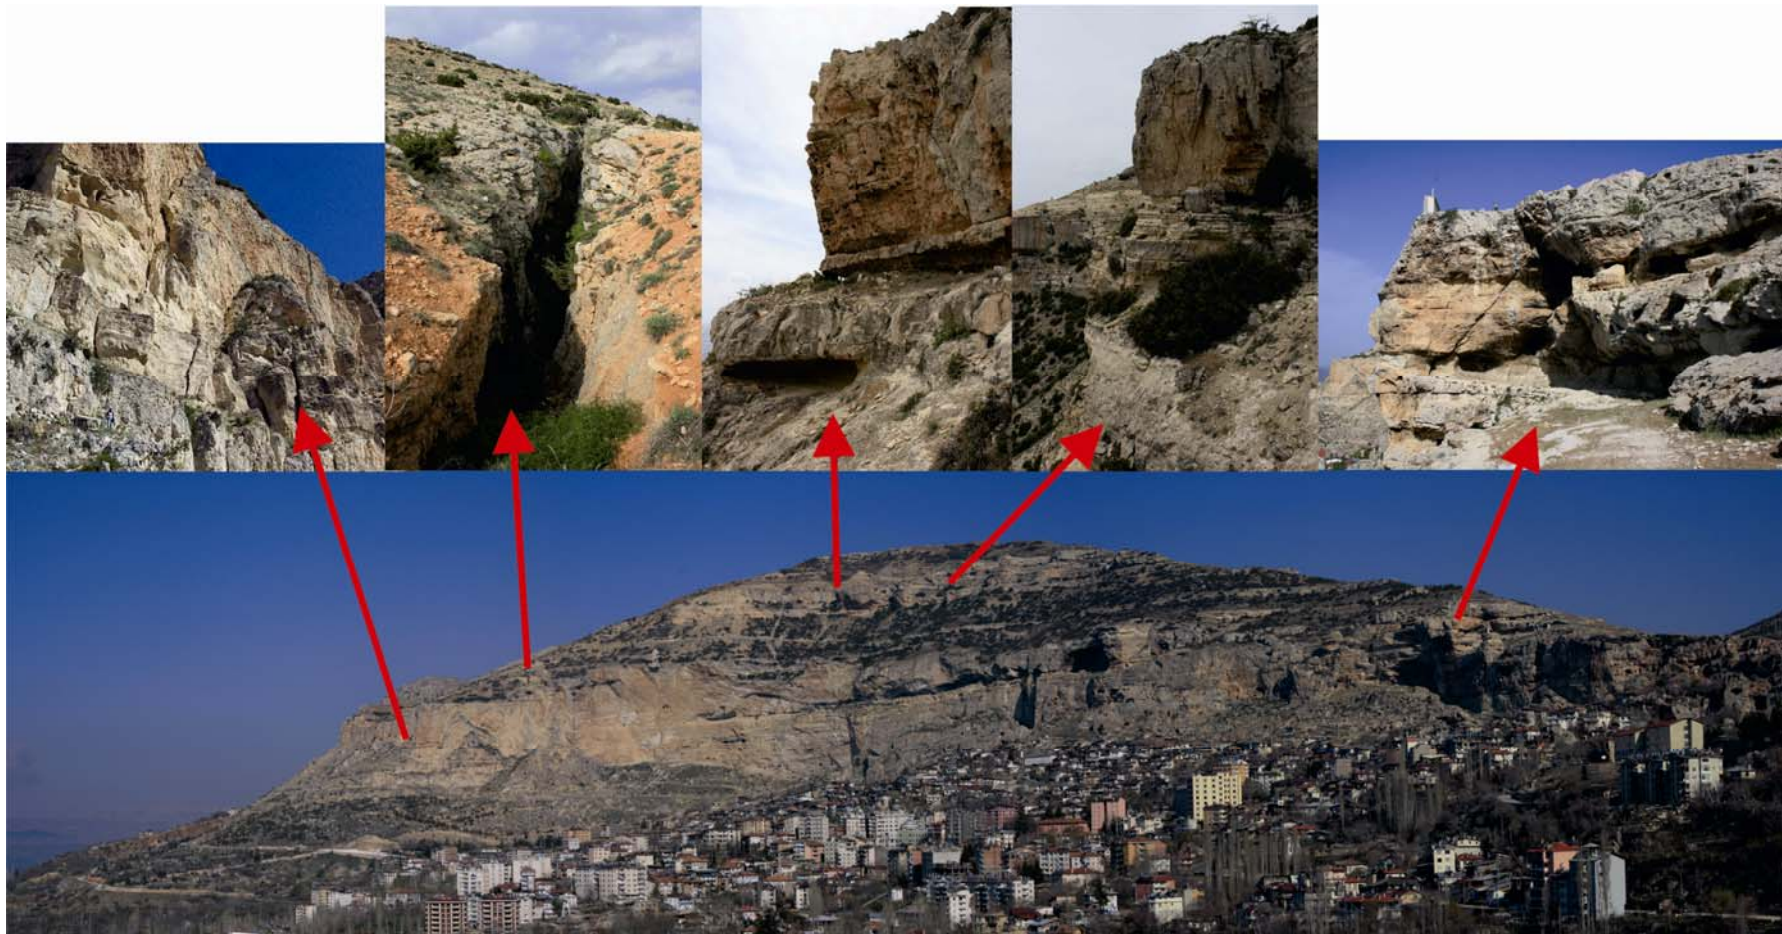

561

562

563

**Fig.12** Photograph showing hanging blocks and their location in the study area



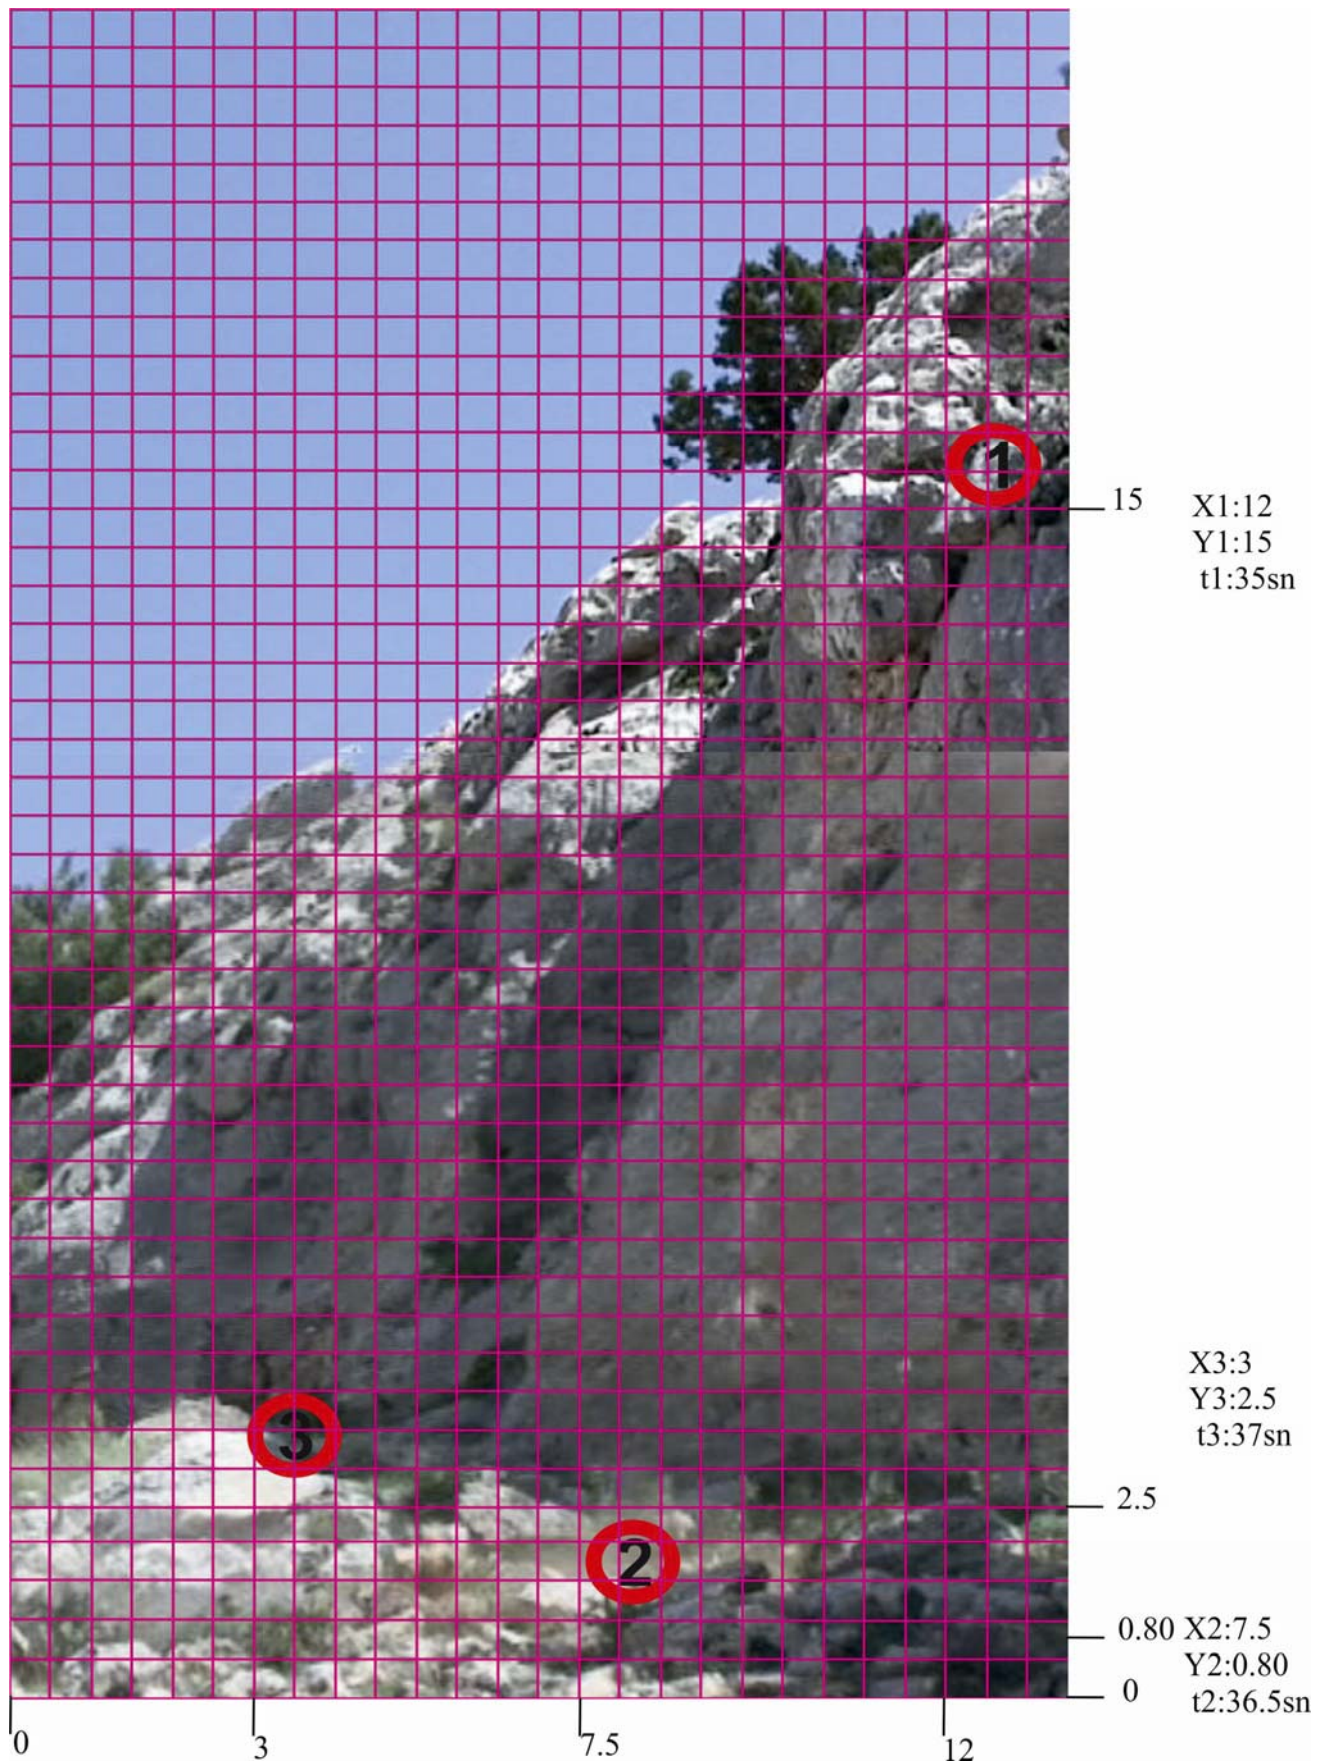

**Fig.13** Back analyses in the field to determine the coefficient of restitutions

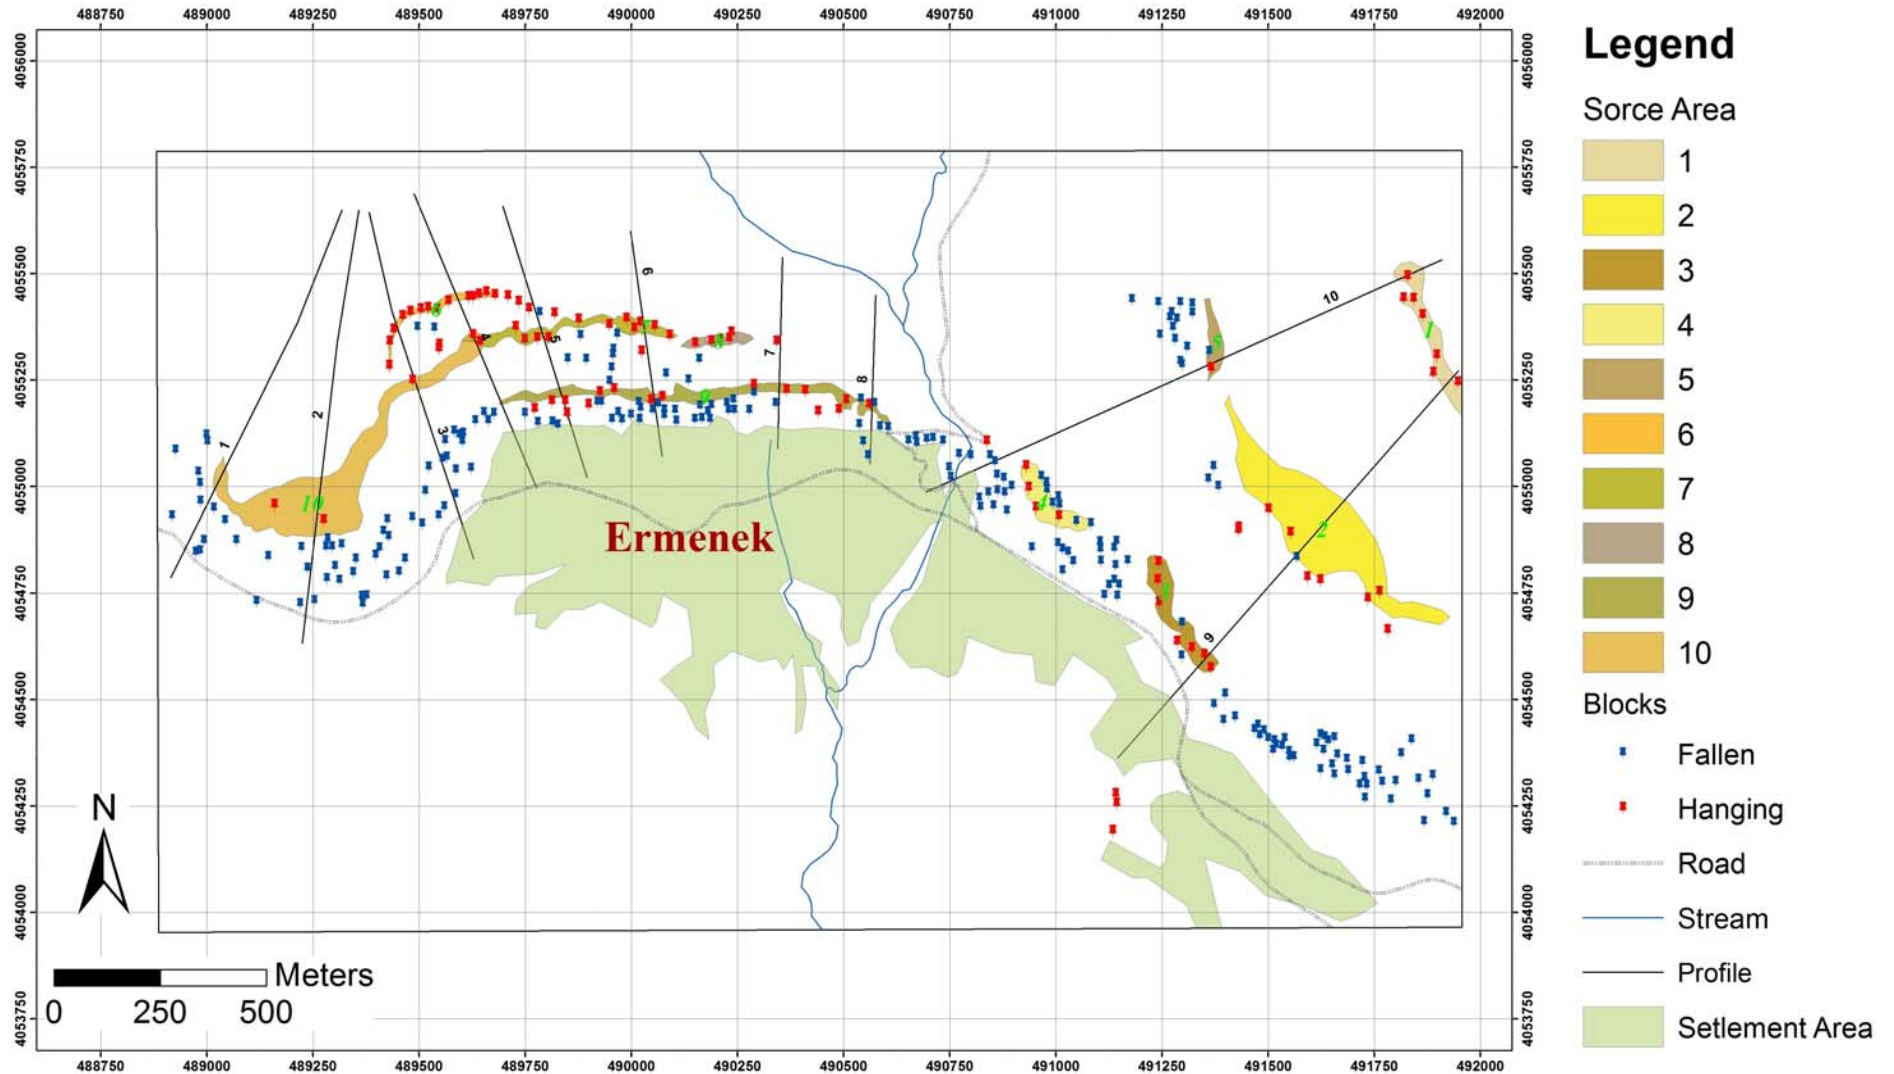

**Fig.14** Distribution of fallen and hanging blocks of the rockfall source areas

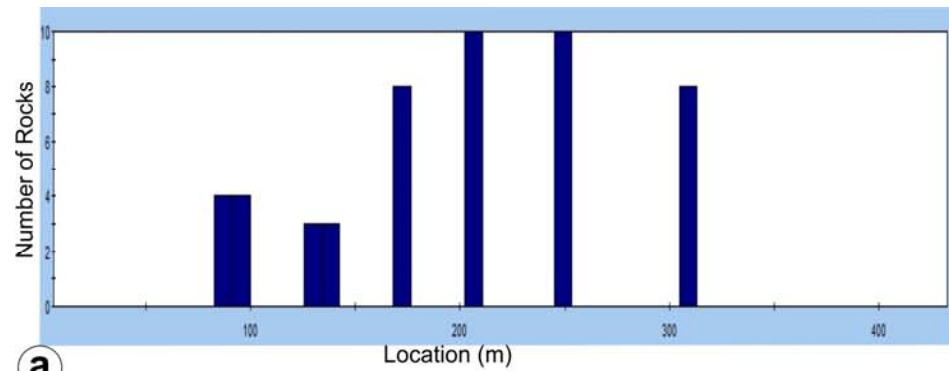

(a)

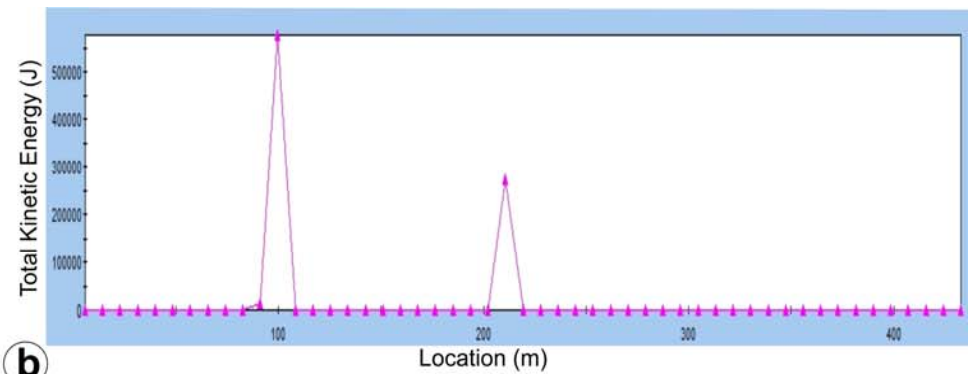

(b)

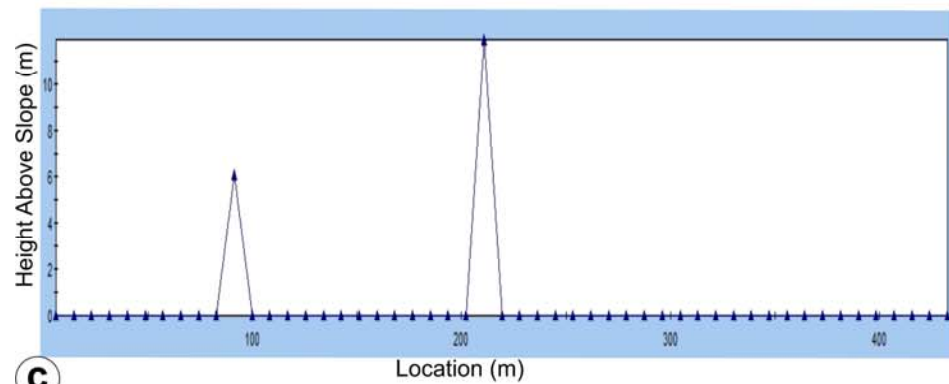

(c)

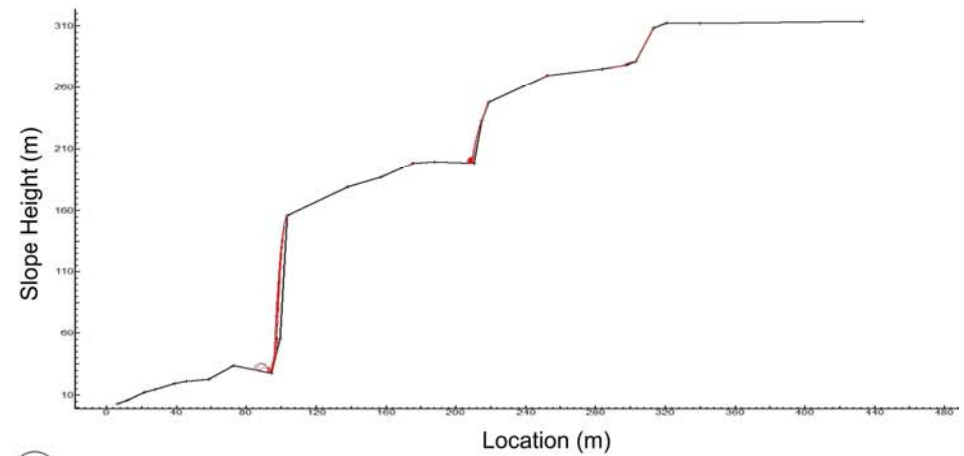

(d)

570

571

572

**Fig Fig.15** An example for the rockfall analyses results (a) runout distance (b) total kinetic energy (c) bounce height (d) the typical rockfall trajectory



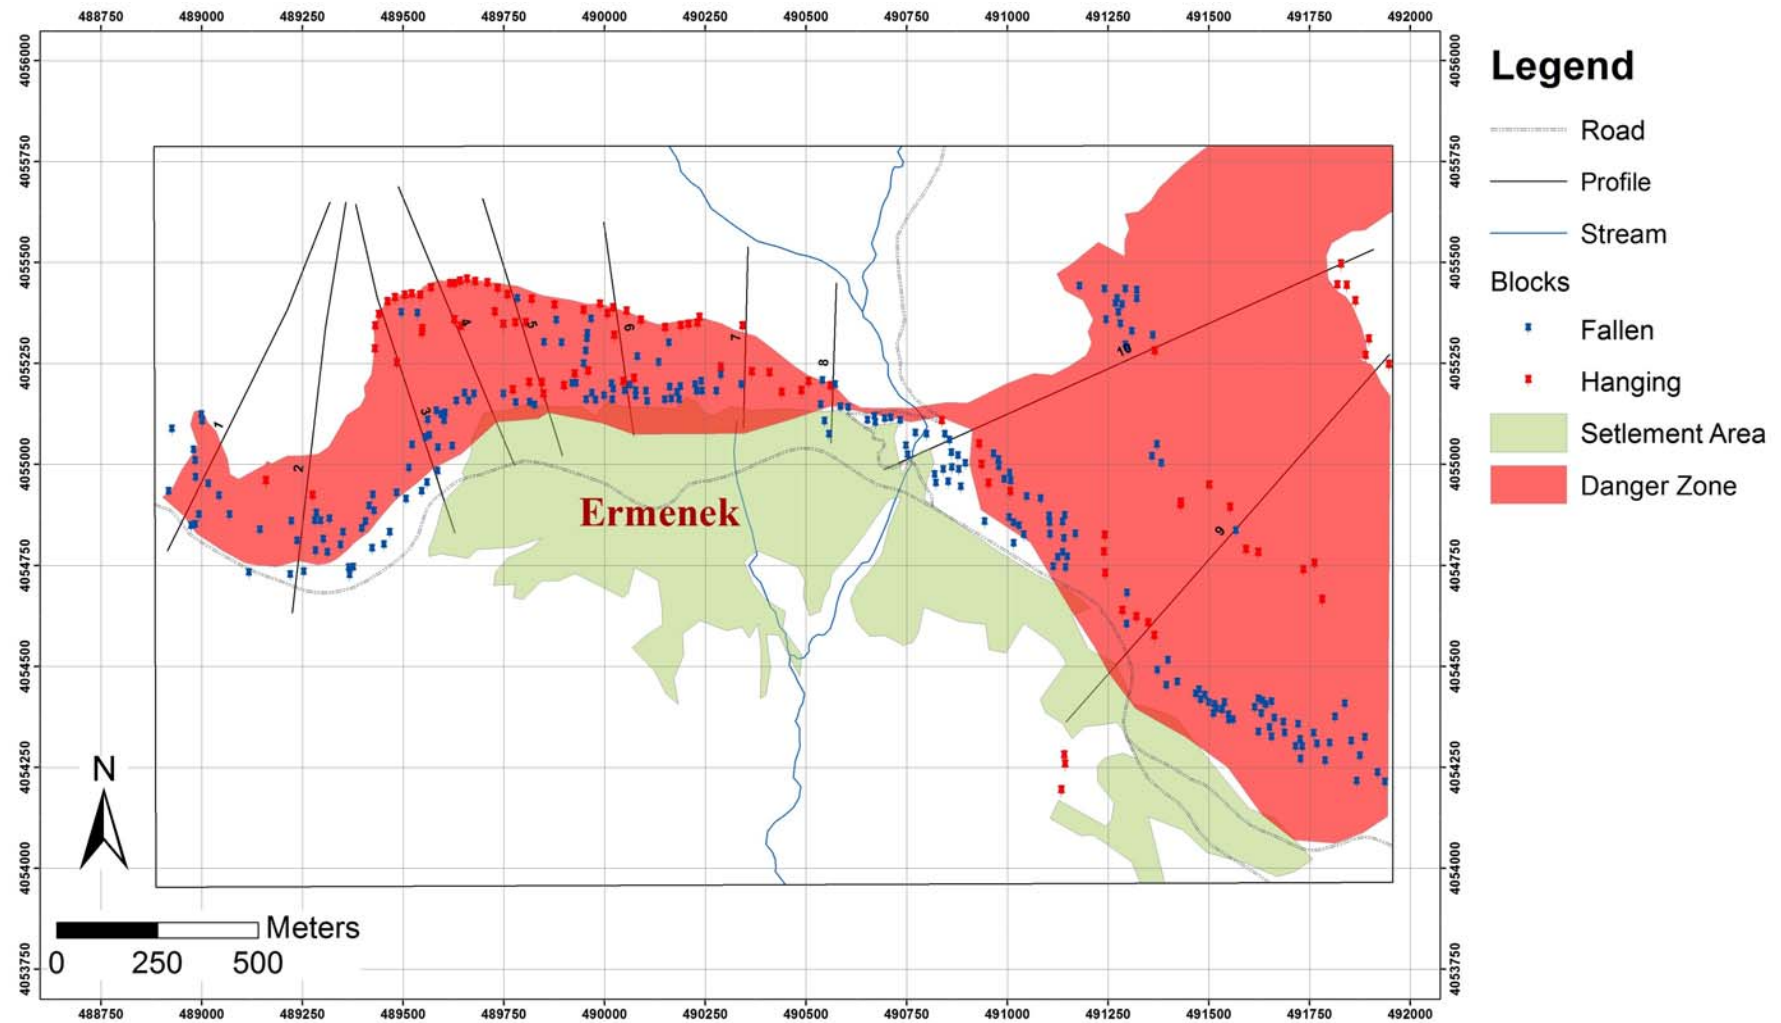

**Fig.16** The map showing the rockfall danger zone of study area
